# Supplementary material for: Ergebnisqualität und Kosten der allgemeinen und spezialisierten Palliativversorgung in Deutschland im regionalen Vergleich: eine GKV-Routinedatenstudie
Source: Springer Nature journal article supplement (doi:10.1007/s00103-023-03746-9), 2023-08-03
Supplement: MOESM1 [file 25883410]

Onlinematerial zum Beitrag:

## **Ergebnisqualität und Kosten der allgemeinen und spezialisierten Palliativversorgung in Deutschland im regionalen Vergleich: eine GKV-Routinedatenstudie**

### **Autoren:**

Antje Freytag<sup>1</sup>, Franziska Meissner<sup>1</sup>, Markus Krause<sup>1</sup>, Thomas Lehmann<sup>2</sup>, Maximiliane Katharina Jansky<sup>3</sup>, Ursula Marschall<sup>4</sup>, Andreas Schmid<sup>5,6</sup>, Nils Schneider<sup>7</sup>, Horst Christian Vollmar<sup>8</sup>, Ulrich Wedding<sup>9</sup>, Bianka Ditscheid<sup>1</sup>

<sup>1</sup> Institut für Allgemeinmedizin, Universitätsklinikum Jena

<sup>2</sup> Zentrum für Klinische Studien, Universitätsklinikum Jena

<sup>3</sup> Klinik für Palliativmedizin, Universitätsmedizin Göttingen

<sup>4</sup> BARMER Institut für Gesundheitssystemforschung, Wuppertal

<sup>5</sup> Gesundheitsökonomie und -management, Rechts- und Wirtschaftswissenschaftliche Fakultät, Universität Bayreuth

<sup>6</sup> Oberender AG, Bayreuth

<sup>7</sup> Institut für Allgemeinmedizin und Palliativmedizin, Medizinische Hochschule Hannover

<sup>8</sup> Abteilung für Allgemeinmedizin (AM RUB), Medizinische Fakultät, Ruhr-Universität Bochum

<sup>9</sup> Abteilung Palliativmedizin der Klinik für Innere Medizin II, Universitätsklinikum Jena

### **Korrespondenzadresse:**

PD Dr. Antje Freytag  
Institut für Allgemeinmedizin  
Universitätsklinikum Jena, Friedrich-Schiller-Universität Jena  
Bachstr. 18, 07743 Jena, Deutschland  
Antje.Freytag@med.uni-jena.de

## Inhalt

|     |                                                                                                          |    |
|-----|----------------------------------------------------------------------------------------------------------|----|
| A.  | eMethoden: Ergänzung zur Methode .....                                                                   | 5  |
| A.1 | Datenquellen und Datenaufbereitung .....                                                                 | 5  |
| A.2 | Studienpopulation .....                                                                                  | 5  |
| A.3 | Auswahl und Operationalisierung qualitätsbezogener Outcomeindikatoren .....                              | 5  |
| A.4 | Bildung des aggregierten Outcomeindicators und der Ränge .....                                           | 7  |
| A.5 | Operationalisierung der Kostenindikatoren.....                                                           | 8  |
| A.6 | Statistische Analysen.....                                                                               | 11 |
|     | Deskriptive Analyse .....                                                                                | 11 |
|     | Adjustierungsparameter der potenziell palliativversorgungsrelevanten chronischen Grunderkrankungen ..... | 11 |
|     | Zur Methode der Adjustierung der Outcome- und Kostenindikatoren .....                                    | 11 |
| B.  | eErgebnisse: Ergänzungen zu den Ergebnissen.....                                                         | 13 |
| B.1 | Beschreibung der Studienpopulation.....                                                                  | 13 |
|     | Eingeschlossene Versicherte .....                                                                        | 13 |
|     | Studienpopulation nach Patienten- und Wohnkreismerkmalen .....                                           | 14 |
|     | Zusammenhang der Adjustierungsfaktoren und ausgewählter Outcomeindikatoren .....                         | 17 |
|     | Inanspruchnahme der Formen von Palliativversorgung in der Studienpopulation .....                        | 18 |
|     | Beginn der Palliativversorgung vor dem Tod .....                                                         | 20 |
| B.2 | Qualitätsbezogene Outcomes .....                                                                         | 21 |
| B.3 | Gesamtversorgungskosten der letzten drei Lebensmonate .....                                              | 24 |
| B.4 | Palliativversorgungskosten des letzten Lebensjahres.....                                                 | 29 |
|     | Palliativversorgungskosten je Versichertem mit Palliativversorgung .....                                 | 29 |
|     | Palliativversorgungskosten je Versichertem mit der jeweiligen Palliativversorgungsform.....              | 32 |
| B.5 | Kosten-Effektivitäts-Relationen (KER) .....                                                              | 36 |
| B.6 | Zusammenschau der Variabilität aller Zielindikatoren .....                                               | 39 |
| C.  | eDiskussion: Ergänzungen zur Diskussion .....                                                            | 40 |
| C.1 | Externe Validität der Outcomes .....                                                                     | 40 |
| C.2 | Externe Validität der Kosten.....                                                                        | 40 |
| C.3 | Weitere Limitationen der Studie .....                                                                    | 41 |
| D.  | Literatur .....                                                                                          | 42 |

## Verzeichnis der Abbildungen

|                                                                                                                                                                                                           |    |
|-----------------------------------------------------------------------------------------------------------------------------------------------------------------------------------------------------------|----|
| Abbildung B.1-1: Inanspruchnahme der Hauptversorgungsformen durch Versicherte mit Palliativversorgung (2016-2019) in %.....                                                                               | 18 |
| Abbildung B.1-2: Beginn der jew. Palliativversorgungsform als Anzahl Tage vor dem Tod je KV (Mittelwert und Median) .....                                                                                 | 20 |
| Abbildung B.2-1: Qualitätsbezogene Outcomeindikatoren je KV für Versicherte mit Palliativversorgung - ADJUSTIERT.....                                                                                     | 21 |
| Abbildung B.2-2: Qualitätsbezogene Outcomeindikatoren je KV für Versicherte mit Palliativversorgung (mit 95%-Konfidenzintervall) - ADJUSTIERT .....                                                       | 22 |
| Abbildung B.2-3: Veränderung des aggregierten Outcomes nach Adjustierung .....                                                                                                                            | 23 |
| Abbildung B.3-1: Gesamtversorgungskosten der letzten drei Lebensmonate nach Leistungsbereichen je KV je Versichertem mit Palliativversorgung .....                                                        | 27 |
| Abbildung B.3-2: Gesamtversorgungskosten der letzten drei Lebensmonate je KV je Versichertem mit Palliativversorgung (Mittelwert (Rang), 95%-Konfidenzintervall) - ADJUSTIERT .....                       | 28 |
| Abbildung B.4-1: Palliativversorgungskosten des letzten Lebensjahres je KV je Versichertem mit Palliativversorgung (Mittelwert (Rang), 95% Konfidenzintervall) - ADJUSTIERT .....                         | 31 |
| Abbildung B.4-2: Mittelwerte ausgewählter Bestandteile der Palliativversorgungskosten im letzten Lebensjahr je KV je Versichertem mit der jeweiligen Versorgungsform (Euro).....                          | 32 |
| Abbildung B.4-3: Mittelwerte ausgewählter Bestandteile der Palliativversorgungskosten im letzten Lebensjahr je KV je Versichertem mit der jeweiligen Versorgungsform (Euro) - ADJUSTIERT .....            | 33 |
| Abbildung B.4-4: Mediane ausgewählter Bestandteile der Palliativversorgungskosten im letzten Lebensjahr je KV je Versichertem mit der jeweiligen Versorgungsform (Euro).....                              | 34 |
| Abbildung B.4-5: A) SAPV-Kosten je Versichertem mit SAPV, B) SAPV-Kosten plus palliative HKP-Kosten <sup>1</sup> je Versichertem mit SAPV (je KV, Mittelwert (Rang), 95%-Konfidenzintervall).....         | 35 |
| Abbildung B.4-6: A) SAPV-Kosten je Versichertem mit SAPV, B) SAPV-Kosten plus palliative HKP-Kosten <sup>1</sup> je Versichertem mit SAPV (je KV, Mittelwert (Rang), 95%-Konfidenzintervall) - ADJUSTIERT | 35 |
| Abbildung B.5-1: Kosten-Effektivitäts-Relation (KER) je KV-Region - ADJUSTIERT .....                                                                                                                      | 36 |

## Verzeichnis der Tabellen

|                                                                                                                                                                                                                                                                              |    |
|------------------------------------------------------------------------------------------------------------------------------------------------------------------------------------------------------------------------------------------------------------------------------|----|
| Tabelle A.3-1: Definition der qualitätsbezogenen Outcomeindikatoren .....                                                                                                                                                                                                    | 5  |
| Tabelle A.5-1: Leistungsbereiche der Gesamtversorgungskosten <sup>1</sup> .....                                                                                                                                                                                              | 8  |
| Tabelle A.5-2: Bestandteile der Palliativversorgungskosten <sup>1</sup> .....                                                                                                                                                                                                | 9  |
| Tabelle A.6-1: Potenziell palliativversorgungsrelevante chronische Grunderkrankungen <sup>1</sup> .....                                                                                                                                                                      | 11 |
| Tabelle B.1-1: Studienpopulation je KV sowie Einordnung der Studienpopulation in die Gesamtheit aller Verstorbener: Versicherte (n) und deren Anteil (%) an allen Verstorbenen sowie an der jeweiligen bundesweiten Population (alters- und geschlechtsstandardisiert) ..... | 13 |
| Tabelle B.1-2: Patienten- und Wohnkreismerkmale, aggregiert über alle KV-Regionen (alters- und geschlechtsstandardisiert) .....                                                                                                                                              | 14 |
| Tabelle B.1-3: Patienten- und Wohnkreismerkmale (außer Grunderkrankungen) je KV (alters- und geschlechtsstandardisiert) .....                                                                                                                                                | 15 |
| Tabelle B.1-4: Patientenmerkmale (nur Grunderkrankungen) je KV (alters- und geschlechtsstandardisiert) .....                                                                                                                                                                 | 16 |
| Tabelle B.1-5: Zusammenhang der Patienten- und Wohnkreismerkmale mit dem Outcome „Versterben im Krankenhaus“ und den Gesamtversorgungskosten der letzten drei Lebensmonate für Versicherte mit Palliativversorgung .....                                                     | 17 |
| Tabelle B.1-6: Inanspruchnahme der Hauptversorgungsformen durch Versicherte mit Palliativversorgung (2016-2019) in % .....                                                                                                                                                   | 19 |
| Tabelle B.3-1: Gesamtversorgungskosten sowie Pflegekosten der drei letzten Lebensmonate je KV je Versichertem mit Palliativversorgung (Euro, MW, S) .....                                                                                                                    | 24 |
| Tabelle B.3-2: Gesamtversorgungskosten sowie Pflegekosten der letzten drei Lebensmonate je KV je Versichertem mit Palliativversorgung (Euro, Median, IQA) .....                                                                                                              | 25 |
| Tabelle B.4-1: Palliativversorgungskosten des letzten Lebensjahres je KV je Versichertem mit Palliativversorgung (Euro, MW, S) .....                                                                                                                                         | 29 |
| Tabelle B.4-2: Palliativversorgungskosten des letzten Lebensjahres je KV je Versichertem mit Palliativversorgung (Euro, Median, IQA) .....                                                                                                                                   | 30 |
| Tabelle B.5-1: Kosten-Effektivitäts-Relation (KER) je KV-Region .....                                                                                                                                                                                                        | 37 |
| Tabelle B.6-1: Variabilität der qualitäts- und kostenbezogenen Outcomeindikatoren zwischen den KV-Regionen .....                                                                                                                                                             | 39 |

## A. eMethoden: Ergänzung zur Methode

### A.1 Datenquellen und Datenaufbereitung

Für Details zu den Datenquellen und zur Datenaufbereitung siehe Onlinematerial (Abschnitte A.1 und A.5) zur Publikation von Ditscheid et al. 2023 [1].

### A.2 Studienpopulation

In die Analysen gingen lediglich solche Verstorbenen ein, die im letzten Lebensjahr palliativ versorgt wurden, d.h. mindestens eine der folgenden Hauptformen der Hospiz- und Palliativversorgung in Anspruch genommen haben und somit als „VS mit Palliativversorgung“ gelten:

- AAPV (Allgemeine ambulante Palliativversorgung),
- BQKPMV (Besonders qualifizierte und koordinierte palliativmedizinische Versorgung),
- SAPV (Spezialisierte ambulante Palliativversorgung), der auch die durch den Palliativen Konsiliardienst (PKD) in Westfalen-Lippe geleistete Palliativversorgung zugeordnet wird,
- stationäre PV (Palliativversorgung),
- stationäre Hospizversorgung.

Für weitere versichertenbezogene Ein- und Ausschlusskriterien sowie Details zur Identifizierung der Inanspruchnahme der verschiedenen Formen von Palliativversorgung siehe Onlinematerial (Abschnitte A.2 und A.3) zur Publikation von Ditscheid et al. 2023 [1].

### A.3 Auswahl und Operationalisierung qualitätsbezogener Outcomeindikatoren

Die (Ergebnis-)qualitätsbezogenen Outcomeindikatoren wurden wie folgt quantifiziert (Tabelle A.3-1).

**Tabelle A.3-1: Definition der qualitätsbezogenen Outcomeindikatoren**

| Outcomeindikator                                                                                  | Bezugszeitraum        | Definition                                                                                                                                                                                                                                                        |
|---------------------------------------------------------------------------------------------------|-----------------------|-------------------------------------------------------------------------------------------------------------------------------------------------------------------------------------------------------------------------------------------------------------------|
| Versterben im Krankenhaus (Sterbeort KH)                                                          | Tod                   | Krankenhausfall mit Entlassungsgrund ,079' (Tod)                                                                                                                                                                                                                  |
| Versterben im Krankenhaus, aber nicht auf Palliativstation (Sterbeort KH, nicht Palliativstation) | Tod                   | Krankenhausfall mit Entlassungsgrund ,079' (Tod) UND NICHT Fachabteilung Entlassung ,3752' (Palliativmedizin)                                                                                                                                                     |
| Rettungsdiensteinsatz                                                                             | letzte 30 Lebensstage | Mind. 1 Rettungsdiensteinsatz:<br>Verordnungsart (1. Stelle des Schlüssels nach Bundeseinheitlichem Positionsnummernverzeichnis für Krankentransportleitungen)<br>... '1' (Notarztwagen) ODER<br>... '2' (Notarzteinsatzfahrzeug) ODER<br>... '3' (Rettungswagen) |
| Krankenhausaufenthalt (KH-Fall)                                                                   | letzte 30 Lebensstage | Mind. 1 neu beginnender, vollstationärer Krankenhausaufenthalt                                                                                                                                                                                                    |

| Outcomeindikator                                                             | Bezugszeitraum       | Definition                                                                                                                                                                                                                                                                                                                                                                                                                                                                                                                                                                                                                                                                                                                                                                                                                     |
|------------------------------------------------------------------------------|----------------------|--------------------------------------------------------------------------------------------------------------------------------------------------------------------------------------------------------------------------------------------------------------------------------------------------------------------------------------------------------------------------------------------------------------------------------------------------------------------------------------------------------------------------------------------------------------------------------------------------------------------------------------------------------------------------------------------------------------------------------------------------------------------------------------------------------------------------------|
| Krankenhausaufenthalt ohne palliativmedizinische Leistung (KH-Fall, ohne PV) | letzte 30 Lebenstage | Mind. 1 neu beginnender, vollstationärer Krankenhausaufenthalt<br>...ohne OPS 8-982* (Palliativmedizinische Komplexbehandlung) UND<br>ohne OPS 8-98e* (Spezialisierte stationäre palliativmedizinische Komplexbehandlung) UND<br>ohne OPS 8-98h* (Spezialisierte palliativmedizinische Komplexbehandlung durch einen Palliativdienst)                                                                                                                                                                                                                                                                                                                                                                                                                                                                                          |
| Intensivmedizinischer Krankenhausaufenthalt (ITS-Aufenthalt)                 | letzte 30 Lebenstage | Inanspruchnahme einer stationären intensivmedizinischen Behandlung:<br>§301 SGB V-Daten:<br>...OPS 8-980* (Intensivmedizinische Komplexbehandlung) ODER<br>...OPS 8-98f* (Aufwändige intensivmedizinische Komplexbehandlung)                                                                                                                                                                                                                                                                                                                                                                                                                                                                                                                                                                                                   |
| Chemotherapie                                                                | letzte 30 Lebenstage | Inanspruchnahme mind. einer der folgenden ambulanten oder stationären Leistungen in der Teilpopulation der Versicherten mit Tumorerkrankung (ICD-10-GM C00-C97):<br>§300 SGB V-Daten:<br>PZN 09999092 (Zytostatika-Zubereitungen) ODER<br>ATC-Code L01* (Antineoplastische Mittel) UND NICHT<br>ATC-Code L01CH* (homöopathische und anthroposophische Mittel) ODER<br>ATC-Code L01CP* (pflanzliche Mittel)<br>§295 SGB V-Daten (Onkologie-Vereinbarung):<br>GOP 86514 (Zuschlag für die intrakavitär applizierte medikamentöse Tumorthherapie) ODER<br>GOP 86516 (Zuschlag für die intravasal applizierte medikamentöse Tumorthherapie) ODER<br>...GOP 86520 (Zuschlag für die orale medikamentöse Tumorthherapie)<br>§301 SGB V-Daten:<br>OPS 8-54* (Zytostatische Chemotherapie, Immuntherapie und antiretrovirale Therapie) |
| Parenterale Ernährung                                                        | letzte 30 Lebenstage | Inanspruchnahme mind. einer der folgenden ambulanten oder stationären Leistungen in der Teilpopulation der Versicherten ohne gastrointestinalen Tumor ODER gastrointestinale Metastasen (ICD-10-GM: C15-C26, C78.4-C78.8):<br>§300 SGB V-Daten:<br>ATC-Code B05BA* (Lösungen zur parenteralen Ernährung) ODER<br>§301 SGB V-Daten:<br>...OPS 8-016* (Parenterale Ernährungstherapie als medizinische Hauptbehandlung) ODER<br>... OPS 8-018* (Komplette parenterale Ernährung als medizinische Nebenbehandlung)                                                                                                                                                                                                                                                                                                                |

| Outcomeindikator | Bezugszeitraum       | Definition                                                                                                                                                                                                                                                                                                                                                                                                                                  |
|------------------|----------------------|---------------------------------------------------------------------------------------------------------------------------------------------------------------------------------------------------------------------------------------------------------------------------------------------------------------------------------------------------------------------------------------------------------------------------------------------|
| Magensonde (PEG) | letzte 30 Lebenstage | Inanspruchnahme mind. einer der folgenden ambulanten oder stationären Leistungen in der Teilpopulation der Versicherten ohne gastrointestinalen Tumor ODER gastrointestinale Metastasen (ICD-10-GM: C15-C26, C78.4-C78.8):<br>§295 SGB V-Daten:<br>GOP 13412 (Perkutane Gastrostomie) ODER<br>§301 SGB V-Daten:<br>...OPS 5-431.2* (Gastrostomie, perkutan-endoskopisch (PEG)) ODER<br>...OPS 8-123.0 (Wechsel eines Gastrostomiekatheters) |

*ATC-Code: Anatomisch-therapeutisch-chemischer Code, GOP: Gebührenordnungsposition des Einheitlichen Bewertungsmaßstabs, ICD-10-GM: Internationale statistische Klassifikation der Krankheiten und verwandter Gesundheitsprobleme, 10. Revision, German Modification, ITS: Intensivstation, KH: Krankenhaus, OPS: Operationen- und Prozedurenschlüssel, PEG: Perkutan-endoskopische Gastrostomie, PZN: Pharmazentralnummer*

#### A.4 Bildung des aggregierten Outcomeindikators und der Ränge

Ergänzend wurden die neun qualitätsbezogenen Outcomeindikatoren zu einem aggregierten Outcome zusammengefasst. Hierzu wurde für alle Outcomeindikatoren zunächst die jeweilige (alters- und geschlechtsstandardisierte) mittlere Rate je KV bestimmt. Die 17 mittleren Raten jedes Outcomeindikators wurden anschließend z-standardisiert, also auf eine Skala mit einem Mittelwert von 0 und einer Standardabweichung von 1 gebracht. Der Wert für den aggregierten Outcome jeder KV wurde schließlich als arithmetisches Mittel ihrer 9 z-standardisierten Raten gebildet. Der aggregierte Outcome, in den alle neun Indikatoren mit gleichem Gewicht einfließen, misst, ob die durch diese Indikatoren geschätzte Versorgungsqualität in der betreffende KV insgesamt über dem Durchschnitt der KV-Regionen liegt (negative Werte auf dem aggregierten Outcome) oder darunter (positive Werte auf dem aggregierten Outcome). Je kleiner der Betrag des aggregierten Outcomes, desto näher liegt die betreffende KV am Durchschnitt. Umgekehrt gilt, dass ein hoher (positiver oder negativer) Wert auf dem aggregierten Outcome anzeigt, dass die betreffende KV stark vom Durchschnitt abweicht.

Zur Ausgabe des Ranges, den jede KV hinsichtlich eines bestimmten Indikators (z.B. Versterben im Krankenhaus) einnimmt, wurden die 17 KV-Regionen zunächst entsprechend ihrer Werte sortiert. Die KV mit dem qualitativ „besten“ Wert wurde dabei auf die erste Position, also auf Rang 1, gesetzt. Die anderen KV-Regionen folgen entsprechend ihrer Werte auf den dahinterliegenden Rängen. Bei einem Gleichstand mehrerer KV-Regionen, also bei exakt gleichen Werten, wird für die betreffenden KV-Regionen derselbe Rang ausgewiesen. Tritt bei einem Indikator ein solcher Fall ein, wird für die in der sortierten Verteilung nachfolgenden KV-Regionen die Rangzählung lückenlos fortgesetzt. Dies bedeutet, dass die „schlechteste“ KV nicht zwangsläufig den Rang 17 erhalten muss. Stattdessen kann der letzte Rang auch einmal Rang 16, 15, etc. sein (je nach Anzahl der beschriebenen Gleichstände in der Verteilung).

Bei nahezu allen Indikatoren, die in dieser Arbeit betrachtet werden, können niedrige Werte (d.h. niedrige Raten, niedrige Kosten) als vorteilhafter angesehen werden. Entsprechend nehmen KV-Regionen mit niedrigen Werten in der Regel die vorderen Ränge ein. Ausgenommen von dieser Regel sind der Indikator „Versterben in der Häuslichkeit“, der zur Berechnung der Kosteneffektivität

herangezogen wird, sowie die Indikatoren der Inanspruchnahme palliativer Versorgung (Inanspruchnahmeraten, Beginn der Versorgung). Bei diesen Indikatoren sind hohe Raten bzw. Werte positiv zu werten. Entsprechend wird hier jeweils der KV mit der höchsten Rate bzw. dem höchsten Wert der Rang 1 zugewiesen. Die weitere Bestimmung der Ränge folgt dem zuvor Genannten. Bei den Patientenmerkmalen wird keine Bewertung hoher/niedriger Werte vorgenommen. Ränge werden hier stets ausgehend von der höchsten Rate bzw. dem höchsten Wert vergeben.

## A.5 Operationalisierung der Kostenindikatoren

Für den Vergleich der KV-Regionen hinsichtlich der Kostenwirkungen ihrer Palliativversorgung betrachteten wir die Gesamtversorgungskosten innerhalb der letzten drei Lebensmonate.

Die Gesamtversorgungskosten der letzten drei Lebensmonate summieren sich über die jeweiligen Kosten der einzelnen Leistungsbereiche (Tabelle A.5-1). Der Bezugszeitraum wurde Versichertenindividuell ausgehend vom jeweiligen Todesdatum berechnet.

**Tabelle A.5-1: Leistungsbereiche der Gesamtversorgungskosten<sup>1</sup>**

| Kostenindikator                                                                          | Zuordnung zum Bezugszeitraum    | Definition                                                                                                                                                                                                                  | Anmerkung                                                                                                                                                                                                                                                                                   |
|------------------------------------------------------------------------------------------|---------------------------------|-----------------------------------------------------------------------------------------------------------------------------------------------------------------------------------------------------------------------------|---------------------------------------------------------------------------------------------------------------------------------------------------------------------------------------------------------------------------------------------------------------------------------------------|
| Ambulante ärztliche Versorgung (§§294/295 SGB V, auch i.V.m. §73b, §132d und §140 SGB V) | nach Fallende                   | Kostenberechnung als Summe der Punktzahlen auf Fallebene, multipliziert mit dem jeweilig gültigen Orientierungspunktwert und Addition weiterer Kosten, die mit Kostenwert angegeben sind (Selektivvertragliche Leistungen). | Behandlungsfälle gehen als Ganzes ein; ggf. sind dies zwei Quartale → Überschätzung dieser Kosten; enthalten sind hier auch die Kosten der AAPV, BQKPMV sowie SAPV-Verordnungen, selektivvertragliche, ärztliche SAPV/PKD <sup>2</sup> -Leistungen (Berlin, Nordrhein und Westfalen-Lippe). |
| HKP (§302 SGB V, auch i.V.m. §132d SGB V)                                                | anteilig nach Leistungszeitraum | Summe aller HKP-Leistungen im Bezugszeitraum.                                                                                                                                                                               | Enthalten auch SAPV-Leistungsabrechnungen.                                                                                                                                                                                                                                                  |
| Krankenhaus (§ 301 SGB V)                                                                | anteilig nach Leistungszeitraum | Summe der Krankenhausfallkosten im Bezugszeitraum abzgl. Zuzahlung.                                                                                                                                                         | Umfasst voll-, teil- und vorstationäre Krankenhausbehandlungen, auch im Krankenhaus erbrachte palliativmedizinische Leistungen.                                                                                                                                                             |
| Rettungsdienst (§302 SGB V)                                                              | nach Leistungsbeginn            | Nettosumme der Kosten aller Rettungsdiensteseinsätze im Bezugszeitraum.                                                                                                                                                     | Ggf. angefallene Zuzahlungen sind berücksichtigt.                                                                                                                                                                                                                                           |
| Krankentransport (§302 SGB V)                                                            | nach Leistungsbeginn            | Nettosumme der Kosten aller Fahrten und Krankentransporte im Bezugszeitraum.                                                                                                                                                | Ggf. angefallene Zuzahlungen sind berücksichtigt.                                                                                                                                                                                                                                           |



| Kostenindikator                                         | Zuordnung zum Bezugszeitraum      | Definition                                                                                                            | Anmerkung                                                                                                                              |
|---------------------------------------------------------|-----------------------------------|-----------------------------------------------------------------------------------------------------------------------|----------------------------------------------------------------------------------------------------------------------------------------|
| Hospiz (§39a SGB V)                                     | anteilig nach Leistungszeitraum   | Summe aller Zuschüsse für stationäre, teilstationäre und ambulante Hospizbehandlungen im Bezugszeitraum. <sup>3</sup> |                                                                                                                                        |
| Arzneimittel (§300 SGB V)                               | nach dem Arzneimittel-Abgabedatum | Bruttosumme der Kosten aller Arzneimittel im Bezugszeitraum.                                                          | Über die Apotheke abgegebene Hilfsmittel sind ebenfalls enthalten. Ggf. angefallene Zuzahlungen und Rabatte sind nicht berücksichtigt. |
| Heilmittel (§302 SGB V)                                 | anteilig nach Leistungszeitraum   | Nettosumme der Kosten aller Heilmittel im Bezugszeitraum.                                                             | Ggf. angefallene Zuzahlungen sind berücksichtigt.                                                                                      |
| Hilfsmittel (§302 SGB V)                                | anteilig nach Leistungszeitraum   | Nettosumme der Kosten aller Hilfsmittel im Bezugszeitraum.                                                            | Ggf. angefallene Zuzahlungen sind berücksichtigt.                                                                                      |
| Pflegeleistungen (SGB XI)<br><i>separat ausgewiesen</i> | anteilig nach Rechnungszeitraum   | Summe der Kosten aller Pflege- und Zusatzleistungen im Bezugszeitraum.                                                | Nur für die Subpopulation der Verstorbenen aus 2018 und 2019 verfügbar.                                                                |

HKP: Häusliche Krankenpflege (SGB V),

<sup>1</sup>Bezugszeitraum: letzte 3 Lebensmonate, <sup>2</sup>(ambulanter) Palliativmedizinischer Konsiliardienst in Westfalen-Lippe, <sup>3</sup>zu 99,5% stationäre Hospizbehandlungen

Während die Kostenwirkungen der Palliativversorgung in einer KV-Region also anhand der Gesamtversorgungskosten der letzten drei Lebensmonate gemessen wurden, die auch die Palliativversorgungskosten in diesem Zeitraum enthalten, verglichen wir darüber hinaus explizit auch die Kosten der Palliativversorgung („Interventionskosten“) zwischen den KV-Regionen. Äquivalent zur Einschlussbedingung der Studienpopulation „Verstorbene mit Palliativversorgung im letzten Lebensjahr“, bezogen wir dazu auch die Palliativversorgungskosten des gesamten letzten Lebensjahres ein.

Tabelle A.5-2 erläutert die Kostenbestandteile der Palliativversorgungskosten des letzten Lebensjahres.

Die jeweils zugrundeliegenden Einzelleistungen und deren Identifizierung in den GKV-Routinedaten wurden bereits ausführlich im Onlinematerial unserer vorausgegangenen Publikation durch Ditscheid et al. 2023 [1] beschrieben.

**Tabelle A.5-2: Bestandteile der Palliativversorgungskosten<sup>1</sup>**

| Kostenindikator                                    | Zuordnung zum Bezugszeitraum | Definition                                                                                                                                                                               |
|----------------------------------------------------|------------------------------|------------------------------------------------------------------------------------------------------------------------------------------------------------------------------------------|
| <b>Bestandteile der Palliativversorgungskosten</b> |                              |                                                                                                                                                                                          |
| AAPV                                               | nach dem Leistungsdatum      | Kostenberechnung als Summe der Punktzahlen für alle im Bezugszeitraum abgerechneten Leistungen multipliziert mit dem jeweils gültigen Orientierungspunktwert und Addition von Kosten für |

| Kostenindikator                                                 | Zuordnung zum Bezugszeitraum                                                                                                    | Definition                                                                                                                                                                                                                                                                                                                                                                                                                                                                                                             |
|-----------------------------------------------------------------|---------------------------------------------------------------------------------------------------------------------------------|------------------------------------------------------------------------------------------------------------------------------------------------------------------------------------------------------------------------------------------------------------------------------------------------------------------------------------------------------------------------------------------------------------------------------------------------------------------------------------------------------------------------|
|                                                                 |                                                                                                                                 | AAPV-Leistungen aus HzV- und Selektivverträgen, einschließlich der Onkologie-Vereinbarung (16) im Bezugszeitraum.<br>Zu den (erweiterten) AAPV-Leistungen zählen wir auch die von den Qualifizierten Palliativärzten (QPA) in Nordrhein abgerechneten Leistungen der Palliativversorgung.                                                                                                                                                                                                                              |
| BQKPmV                                                          | nach dem Leistungsdatum                                                                                                         | Kostenberechnung als Summe der Punktzahlen für alle im Bezugszeitraum abgerechneten Leistungen multipliziert mit dem jeweils gültigen Orientierungspunktwert                                                                                                                                                                                                                                                                                                                                                           |
| SAPV                                                            | nach dem Leistungsdatum (SAPV-Verordnung, SAPV aus Selektivverträgen) bzw. anteilig nach Leistungszeitraum (SAPV aus HKP-Daten) | Kostenberechnung als Summe der Punktzahlen für alle im Bezugszeitraum abgerechneten Leistungen multipliziert mit dem jeweils gültigen Orientierungspunktwert (SAPV-Verordnungen), Addition von Kosten für alle SAPV-Leistungen aus Selektivverträgen im Bezugszeitraum und von Kosten für SAPV-Leistungen aus HKP-Daten im Bezugszeitraum.<br>Zur SAPV zählen wir auch die Leistungen der Palliativmedizinischen Konsiliardienste (PKD) in Verbindung mit den Qualifizierten Palliativärzten (QPA) in Westfalen-Lippe. |
| Palliative HKP (HKP <sub>pall</sub> )                           | anteilig nach Leistungszeitraum                                                                                                 | Summe aller palliativen HKP-Leistungen im Bezugszeitraum                                                                                                                                                                                                                                                                                                                                                                                                                                                               |
| HKP ab erster ambulanter Palliativleistung (HKP <sub>aP</sub> ) | nach dem Leistungsbeginn                                                                                                        | Summe aller palliativen HKP-Leistungen, deren Leistungsbeginn $\geq$ dem Leistungsdatum der ersten ambulanten Palliativleistung ist                                                                                                                                                                                                                                                                                                                                                                                    |
| Stationäre Palliativversorgung im Krankenhaus (stat.PV)         | anteilig nach Leistungszeitraum                                                                                                 | Summe der Entgeltkosten für palliative OPS und palliative Entgelte im Bezugszeitraum.                                                                                                                                                                                                                                                                                                                                                                                                                                  |
| Hospiz                                                          | anteilig nach Leistungszeitraum                                                                                                 | Summe aller Zuschüsse für stationäre, teilstationäre und ambulante Hospizbehandlungen im Bezugszeitraum. <sup>2</sup>                                                                                                                                                                                                                                                                                                                                                                                                  |
| <b>Zusätzlich ausgewiesen:</b>                                  |                                                                                                                                 |                                                                                                                                                                                                                                                                                                                                                                                                                                                                                                                        |
| HKP gesamt                                                      | anteilig nach Leistungszeitraum                                                                                                 | Summe aller HKP-Leistungen im Bezugszeitraum (abzüglich der in diesem Leistungsbereich enthaltenen SAPV-Leistungen)                                                                                                                                                                                                                                                                                                                                                                                                    |

AAPV: Allgemeine ambulante Palliativversorgung, BQKPmV: Besonders qualifizierte und koordinierte palliativmedizinische Versorgung, HKP: Häusliche Krankenpflege (SGB V), OPS: Operationen- und Prozedurenschlüssel, PV: Palliativversorgung, SAPV: Spezialisierte ambulante Palliativversorgung

<sup>1</sup>Bezugszeitraum: letztes Lebensjahr, <sup>2</sup>zu 99,5% stationäre Hospizbehandlungen

## A.6 Statistische Analysen

Die Analysen führten wir mit R, Version 4.1.2, durch. Alle Analysen beruhen auf alters- und geschlechtsstandardisierten Daten. Die zur Standardisierung herangezogenen Gewichte waren im Rahmen einer früheren Arbeit basierend auf öffentlichen Todesfallstatistiken je Jahr und Bundesland ermittelt worden [1] und wurden für die aktuelle Arbeit übernommen. Die Standardisierungsfaktoren bezogen wir in allen Analysen als Gewichte ein und nutzten dafür Funktionen aus dem R Package *survey* [2]. Für eine Erläuterung zur Ermittlung der Standardisierungsfaktoren sei auf das Onlinematerial von Ditscheid et al. (2013) verwiesen [1].

Um eine ausreichende Datenbasis für die zentralen Zielgrößen zu gewährleisten, erfolgt keine Analyse der Zielgrößen nach dem Sterbejahr der VS.

### Deskriptive Analyse

Für die deskriptive Analyse der Patientenmerkmale, Outcomeindikatoren und Kosten berechneten wir je nach Skalenniveau der Variablen den Anteil in % bzw. Mittelwert und Standardabweichung sowie für ausgewählte Größen weitere statistische Kenngrößen (Median, Min, Max, etc.).

### Adjustierungsparameter der potenziell palliativversorgungsrelevanten chronischen Grunderkrankungen

Die Liste der ICD-10-Diagnosen für die Identifikation potenziell palliativversorgungsrelevanter chronischer Grunderkrankungen (Tabelle A.6-1) orientiert sich an Murtagh et al. [3].

**Tabelle A.6-1: Potenziell palliativversorgungsrelevante chronische Grunderkrankungen<sup>1</sup>**

| Grunderkrankung              | ICD-10-GM Codes                       |
|------------------------------|---------------------------------------|
| Tumorerkrankung              | C00*-C97*                             |
| Herz-Kreislauf-Erkrankung    | I0*-I6*                               |
| Herzinsuffizienz             | I50*                                  |
| Zerebrovaskuläre Erkrankung  | I60*-I69*                             |
| Nierenerkrankung             | N17*-N18*, N28*, I12*-I13*            |
| Lebererkrankung              | K70*-K77*                             |
| Atemwegserkrankung           | J09*-J18*, J20*-J22*, J40*-J47*, J96* |
| Neurodegenerative Erkrankung | G10*, G20*, G35*, G122*, G231-G233*   |
| Demenz, Alzheimer, Senilität | F00*-F03*, G30*, R54*                 |
| HIV, AIDS                    | B20*-B24*                             |

<sup>1</sup>identifiziert anhand einer mindestens einmalig kodierten Diagnose (gesichert ambulant, Krankenhaushaupt- oder -neben diagnose) im letzten Lebensjahr

### Zur Methode der Adjustierung der Outcome- und Kostenindikatoren

Ausgegeben wurden die *Marginal Predictive Means*, also die Raten/Kosten, die sich rechnerisch ergeben, wenn in allen KV-Regionen die gleiche (nämlich die über die gesamte Studienpopulation hinweg beobachtete) Verteilung der Patienten- und Wohnkreismerkmale angenommen wird. Diese Methode der Berechnung (*marginal standardization*) ist in diesem Fall anderen Methoden der Bestimmung adjustierter Werte vorzuziehen [4]. Für die Berechnung nutzten wir die Funktion *svypredmeans* aus dem R Package *survey* [2]. Grundlage der Berechnung ist bei den binären Outcomeindikatoren ein multiples logistisches, bei den Kostenindikatoren ein multiples lineares Regressionsmodell (OLS Regression). Obwohl das Survey-Package robuste Standardfehler garantiert, sicherten wir unsere Schlussfolgerungen hinsichtlich der Kostenindikatoren gegen eine Verzerrung aufgrund der Schiefe der Verteilung ab. Hierzu wurde die Analyse auf Basis eines Generalized Linear Models (GLM) mit Gamma-Verteilung und Log-Link wiederholt. Die im Manuskript berichteten

Schlussfolgerungen ändern sich dadurch nicht, weshalb wir die leichter zugänglichen Ergebnisse auf Basis des linearen Regressionsmodells berichten.

## B. eErgebnisse: Ergänzungen zu den Ergebnissen

### B.1 Beschreibung der Studienpopulation

Eingeschlossene Versicherte

**Tabelle B.1-1: Studienpopulation je KV sowie Einordnung der Studienpopulation in die Gesamtheit aller Verstorbener: Versicherte (n) und deren Anteil (%) an allen Verstorbenen sowie an der jeweiligen bundesweiten Population (alters- und geschlechtsstandardisiert)**

| KV                     | Alle Verstorbenen<br>(N = 417.405) |              |                   | Studienpopulation:<br>Verstorbene mit PV<br>(N = 145.372) |             |           |                   | Verstorbene ohne PV<br>(N = 272.033) |             |                   |
|------------------------|------------------------------------|--------------|-------------------|-----------------------------------------------------------|-------------|-----------|-------------------|--------------------------------------|-------------|-------------------|
|                        | Anteil<br>an allen<br>VS           |              | Anteil<br>an Dtl. | Anteil an allen VS                                        |             |           | Anteil<br>an Dtl. | Anteil<br>an allen<br>VS             |             | Anteil an<br>Dtl. |
|                        | n                                  | %            |                   | n                                                         | %           | Rang      |                   | n                                    | %           |                   |
| Baden-Württemberg      | 34.884                             | 100,0        | 8,4               | <b>11.597</b>                                             | <b>33,2</b> | <b>11</b> | <b>8,0</b>        | 23.287                               | 66,8        | 8,6               |
| Bayern                 | 52.092                             | 100,0        | 12,5              | <b>23.279</b>                                             | <b>44,7</b> | <b>1</b>  | <b>16,0</b>       | 28.813                               | 55,3        | 10,6              |
| Berlin                 | 19.683                             | 100,0        | 4,7               | <b>6.603</b>                                              | <b>33,5</b> | <b>10</b> | <b>4,5</b>        | 13.080                               | 66,5        | 4,8               |
| Brandenburg            | 15.701                             | 100,0        | 3,8               | <b>4.931</b>                                              | <b>31,4</b> | <b>14</b> | <b>3,4</b>        | 10.770                               | 68,6        | 4,0               |
| Bremen                 | 1.955                              | 100,0        | 0,5               | <b>548</b>                                                | <b>28,0</b> | <b>17</b> | <b>0,4</b>        | 1.407                                | 72,0        | 0,5               |
| Hamburg                | 8.678                              | 100,0        | 2,1               | <b>2.838</b>                                              | <b>32,7</b> | <b>13</b> | <b>2,0</b>        | 5.840                                | 67,3        | 2,1               |
| Hessen                 | 35.675                             | 100,0        | 8,5               | <b>12.250</b>                                             | <b>34,3</b> | <b>6</b>  | <b>8,4</b>        | 23.425                               | 65,7        | 8,6               |
| Mecklenburg-Vorpommern | 9.770                              | 100,0        | 2,3               | <b>3.377</b>                                              | <b>34,6</b> | <b>5</b>  | <b>2,3</b>        | 6.393                                | 65,4        | 2,4               |
| Niedersachsen          | 39.842                             | 100,0        | 9,5               | <b>14.302</b>                                             | <b>35,9</b> | <b>2</b>  | <b>9,8</b>        | 25.540                               | 64,1        | 9,4               |
| Nordrhein              | 63.461                             | 100,0        | 15,2              | <b>21.322</b>                                             | <b>33,6</b> | <b>9</b>  | <b>14,7</b>       | 42.139                               | 66,4        | 15,5              |
| Rheinland-Pfalz        | 21.595                             | 100,0        | 5,2               | <b>7.466</b>                                              | <b>34,6</b> | <b>4</b>  | <b>5,1</b>        | 14.129                               | 65,4        | 5,2               |
| Saarland               | 5.219                              | 100,0        | 1,3               | <b>1.777</b>                                              | <b>34,1</b> | <b>7</b>  | <b>1,2</b>        | 3.442                                | 65,9        | 1,3               |
| Sachsen                | 20.185                             | 100,0        | 4,8               | <b>6.148</b>                                              | <b>30,5</b> | <b>15</b> | <b>4,2</b>        | 14.037                               | 69,5        | 5,2               |
| Sachsen-Anhalt         | 12.220                             | 100,0        | 2,9               | <b>3.450</b>                                              | <b>28,2</b> | <b>16</b> | <b>2,4</b>        | 8.770                                | 71,8        | 3,2               |
| Schleswig-Holstein     | 19.053                             | 100,0        | 4,6               | <b>6.411</b>                                              | <b>33,6</b> | <b>8</b>  | <b>4,4</b>        | 12.642                               | 66,4        | 4,6               |
| Thüringen              | 11.098                             | 100,0        | 2,7               | <b>3.936</b>                                              | <b>35,5</b> | <b>3</b>  | <b>2,7</b>        | 7.162                                | 64,5        | 2,6               |
| Westfalen-Lippe        | 46.294                             | 100,0        | 11,1              | <b>15.138</b>                                             | <b>32,7</b> | <b>12</b> | <b>10,4</b>       | 31.156                               | 67,3        | 11,5              |
| <b>Deutschland</b>     | <b>417.405</b>                     | <b>100,0</b> | <b>100,0</b>      | <b>145.372</b>                                            | <b>34,8</b> |           | <b>100,0</b>      | <b>272.033</b>                       | <b>65,2</b> | <b>100,0</b>      |

KV: Kassenärztliche Vereinigung, PV: Palliativversorgung, VS: Verstorbene. Als Studienpopulation (Mitte, fett hervorgehoben) wurden in dieser Arbeit ausschließlich Verstorbene mit PV im letzten Lebensjahr betrachtet.

Studienpopulation nach Patienten- und Wohnkreismerkmalen

**Tabelle B.1-2: Patienten- und Wohnkreismerkmale, aggregiert über alle KV-Regionen (alters- und geschlechtsstandardisiert)**

| <b>N = 145.372</b>                  |                 |
|-------------------------------------|-----------------|
| Geschlecht (weiblich), n (%)        | 77.551 (53,3%)  |
| Alter, MW (S)                       | 78,59 (12,3)    |
| CCI, MW (S)                         | 8,31 (4,1)      |
| Tumor, n (%)                        | 94.886 (65,3%)  |
| Herz-Kreislauf-Erkrankung, n (%)    | 131.743 (90,6%) |
| Herzinsuffizienz, n (%)             | 59.802 (41,1%)  |
| Zerebrovaskuläre Erkrankung, n (%)  | 47.656 (32,8%)  |
| Nierenerkrankung, n (%)             | 71.580 (49,2%)  |
| Lebererkrankung, n (%)              | 31.279 (21,5%)  |
| Atemwegserkrankung, n (%)           | 87.040 (59,9%)  |
| Neurodegenerative Erkrankung, n (%) | 11.297 (7,8%)   |
| Demenz, Alzheimer, Senilität, n (%) | 66.588 (45,8%)  |
| HIV, AIDS, n (%)                    | 202 (0,1%)      |
| Pflegebedarf, n (%)                 |                 |
| Häuslichkeit ohne Pflegegrad        | 16.480 (11,3%)  |
| Häuslichkeit mit Pflegegrad         | 102.523 (70,5%) |
| Pflegeheim                          | 26.368 (18,1%)  |
| Deprivationsgrad, MW (S)            | 0,52 (0,2)      |
| Ländlichkeit, MW (S)                | 0,19 (0,3)      |

CCI: Charlson Comorbidity Index, GE: Grunderkrankung, KV: Kassenärztliche Vereinigung, MW: Mittelwert, S: Standardabweichung

**Tabelle B.1-3: Patienten- und Wohnkreismerkmale (außer Grunderkrankungen) je KV (alters- und geschlechtsstandardisiert)**

| KV                     | Geschlecht (weiblich) |      | Alter               |      | CCI               |      | Pflegetbedarf                |      |                             |      |             |      |                   |      |                   |      |
|------------------------|-----------------------|------|---------------------|------|-------------------|------|------------------------------|------|-----------------------------|------|-------------|------|-------------------|------|-------------------|------|
|                        | %                     | Rang | MW (S)              | Rang | MW (S)            | Rang | Häuslichkeit ohne Pflegegrad |      | Häuslichkeit mit Pflegegrad |      | Pfleheim    |      | Deprivationsgrad  |      | Ländlichkeit      |      |
|                        |                       |      |                     |      |                   |      | %                            | Rang | %                           | Rang | %           | Rang | MW (S)            | Rang | MW (S)            | Rang |
| Baden-Württemberg      | 53,8                  | 5    | 79,08 (12,4)        | 2    | 8,00 (4,1)        | 14   | 10,6                         | 9    | 70,7                        | 11   | 18,7        | 4    | 0,40 (0,1)        | 15   | 0,10 (0,2)        | 11   |
| Bayern                 | 54,5                  | 2    | 80,05 (12,1)        | 1    | 7,99 (4,1)        | 15   | 15,6                         | 1    | 63,0                        | 17   | 21,4        | 1    | 0,33 (0,2)        | 16   | 0,27 (0,3)        | 8    |
| Berlin                 | 53,6                  | 6    | 77,30 (12,4)        | 14   | 9,08 (4,0)        | 2    | 12,6                         | 4    | 70,0                        | 14   | 17,4        | 7    | 0,58 (0,0)        | 11   | 0,00 (0,0)        | 15   |
| Brandenburg            | 49,4                  | 17   | 76,57 (12,3)        | 17   | 9,31 (4,1)        | 1    | 10,6                         | 10   | 76,6                        | 3    | 12,8        | 16   | 0,63 (0,1)        | 6    | 0,41 (0,3)        | 3    |
| Bremen                 | 54,2                  | 3    | 78,40 (11,6)        | 7    | 7,89 (4,0)        | 16   | 9,9                          | 12   | 75,4                        | 5    | 14,7        | 12   | 0,65 (0,1)        | 3    | 0,00 (0,0)        | 15   |
| Hamburg                | 52,2                  | 11   | 77,32 (12,6)        | 13   | 8,31 (4,0)        | 10   | 14,4                         | 2    | 68,4                        | 16   | 17,1        | 9    | 0,32 (0,0)        | 17   | 0,00 (0,0)        | 15   |
| Hessen                 | 53,5                  | 7    | 78,86 (12,4)        | 3    | 7,88 (4,0)        | 17   | 10,5                         | 11   | 72,3                        | 8    | 17,2        | 8    | 0,43 (0,1)        | 14   | 0,15 (0,2)        | 10   |
| Mecklenburg-Vorpommern | 51,2                  | 14   | 77,01 (11,8)        | 16   | 8,92 (4,0)        | 5    | 8,4                          | 17   | 78,9                        | 1    | 12,7        | 17   | 0,72 (0,0)        | 2    | 0,54 (0,3)        | 1    |
| Niedersachsen          | 53,1                  | 8    | 78,65 (12,2)        | 5    | 8,19 (4,1)        | 11   | 9,3                          | 14   | 70,4                        | 13   | 20,3        | 2    | 0,57 (0,1)        | 12   | 0,29 (0,2)        | 7    |
| Nordrhein              | 54,9                  | 1    | 78,72 (12,2)        | 4    | 8,17 (4,1)        | 12   | 9,0                          | 16   | 72,0                        | 10   | 19,1        | 3    | 0,57 (0,2)        | 13   | 0,02 (0,1)        | 14   |
| Rheinland-Pfalz        | 52,9                  | 9    | 78,42 (12,1)        | 6    | 8,31 (4,1)        | 9    | 12,6                         | 5    | 70,5                        | 12   | 16,9        | 10   | 0,60 (0,1)        | 10   | 0,30 (0,3)        | 6    |
| Saarland               | 52,6                  | 10   | 77,95 (11,8)        | 11   | 8,60 (4,1)        | 7    | 11,6                         | 7    | 75,6                        | 4    | 12,8        | 15   | 0,64 (0,1)        | 5    | 0,06 (0,1)        | 13   |
| Sachsen                | 51,9                  | 12   | 78,24 (12,0)        | 9    | 8,82 (4,1)        | 6    | 12,4                         | 6    | 73,0                        | 7    | 14,6        | 13   | 0,61 (0,1)        | 8    | 0,22 (0,2)        | 9    |
| Sachsen-Anhalt         | 50,2                  | 16   | 77,15 (11,8)        | 15   | 9,07 (4,1)        | 3    | 9,1                          | 15   | 77,1                        | 2    | 13,8        | 14   | 0,76 (0,1)        | 1    | 0,42 (0,3)        | 2    |
| Schleswig-Holstein     | 51,8                  | 13   | 77,75 (12,3)        | 12   | 8,02 (4,0)        | 13   | 13,3                         | 3    | 68,8                        | 15   | 18,0        | 6    | 0,62 (0,1)        | 7    | 0,32 (0,3)        | 5    |
| Thüringen              | 51,0                  | 15   | 78,15 (11,6)        | 10   | 9,00 (4,1)        | 4    | 10,8                         | 8    | 73,8                        | 6    | 15,3        | 11   | 0,65 (0,1)        | 4    | 0,37 (0,3)        | 4    |
| Westfalen-Lippe        | 54,0                  | 4    | 78,39 (12,5)        | 8    | 8,43 (4,0)        | 8    | 9,7                          | 13   | 72,1                        | 9    | 18,2        | 5    | 0,60 (0,1)        | 9    | 0,09 (0,1)        | 12   |
| <b>Deutschland</b>     | <b>53,3</b>           | -    | <b>78,59 (12,3)</b> | -    | <b>8,31 (4,1)</b> | -    | <b>11,3</b>                  | -    | <b>70,5</b>                 | -    | <b>18,1</b> | -    | <b>0,52 (0,2)</b> | -    | <b>0,19 (0,3)</b> | -    |

CCI: Charlson Comorbidity Index, KV: Kassenärztliche Vereinigung, MW: Mittelwert, S: Standardabweichung

**Tabelle B.1-4: Patientenmerkmale (nur Grunderkrankungen) je KV (alters- und geschlechtsstandardisiert)**

| KV                     | Tumor       |          | Herz-Kreislauf-Erkrankung |          | Herzinsuffizienz |          | Zerebrovaskuläre Erkrankung |          | Nieren-erkrankung |          | Leber-erkrankung |          | Atemwegs-erkrankung |          | Neurodegenera-tive Erkrankung |          | Demenz, Alzheimer, Senilität |          | HIV, AIDS  |          |
|------------------------|-------------|----------|---------------------------|----------|------------------|----------|-----------------------------|----------|-------------------|----------|------------------|----------|---------------------|----------|-------------------------------|----------|------------------------------|----------|------------|----------|
|                        | %           | Rang     | %                         | Rang     | %                | Rang     | %                           | Rang     | %                 | Rang     | %                | Rang     | %                   | Rang     | %                             | Rang     | %                            | Rang     | %          | Rang     |
| Baden-Württemberg      | 63,9        | 16       | 89,3                      | 14       | 38,6             | 13       | 32,1                        | 11       | 46,7              | 11       | 22,0             | 8        | 58,7                | 10       | 7,3                           | 9        | 51,7                         | 2        | 0,1        | 9        |
| Bayern                 | 57,9        | 17       | 91,2                      | 7        | 45,9             | 2        | 34,8                        | 2        | 53,7              | 5        | 23,6             | 4        | 60,8                | 7        | 8,1                           | 5        | 49,3                         | 3        | 0,1        | 11       |
| Berlin                 | 72,0        | 4        | 89,6                      | 13       | 39,8             | 9        | 29,7                        | 14       | 56,1              | 3        | 22,3             | 7        | 61,2                | 6        | 7,1                           | 13       | 43,2                         | 8        | 0,3        | 1        |
| Brandenburg            | 74,8        | 1        | 91,3                      | 6        | 37,2             | 14       | 28,5                        | 16       | 59,1              | 2        | 22,8             | 5        | 56,8                | 14       | 6,4                           | 17       | 36,1                         | 16       | 0,0        | 15       |
| Bremen                 | 69,3        | 7        | 87,9                      | 15       | 32,4             | 17       | 26,6                        | 17       | 37,1              | 17       | 21,6             | 9        | 54,3                | 16       | 7,6                           | 8        | 35,8                         | 17       | 0,0        | 16       |
| Hamburg                | 72,0        | 3        | 86,4                      | 17       | 34,1             | 16       | 30,2                        | 12       | 41,2              | 16       | 17,9             | 16       | 59,3                | 9        | 7,2                           | 11       | 45,1                         | 5        | 0,3        | 2        |
| Hessen                 | 64,3        | 14       | 89,9                      | 12       | 38,7             | 12       | 30,2                        | 13       | 44,0              | 14       | 20,1             | 14       | 57,5                | 13       | 8,0                           | 6        | 40,3                         | 12       | 0,1        | 8        |
| Mecklenburg-Vorpommern | 72,0        | 5        | 92,1                      | 4        | 39,7             | 10       | 32,5                        | 9        | 53,8              | 4        | 22,7             | 6        | 58,6                | 11       | 6,7                           | 15       | 41,9                         | 11       | 0,1        | 7        |
| Niedersachsen          | 64,3        | 13       | 90,4                      | 10       | 42,9             | 6        | 32,7                        | 8        | 47,1              | 10       | 20,0             | 15       | 59,6                | 8        | 7,2                           | 12       | 54,4                         | 1        | 0,1        | 12       |
| Nordrhein              | 64,6        | 12       | 90,9                      | 9        | 39,2             | 11       | 33,9                        | 5        | 45,9              | 12       | 21,2             | 11       | 61,4                | 5        | 8,4                           | 3        | 48,3                         | 4        | 0,2        | 4        |
| Rheinland-Pfalz        | 64,2        | 15       | 91,8                      | 5        | 43,1             | 5        | 32,9                        | 7        | 47,3              | 9        | 21,5             | 10       | 64,2                | 1        | 8,2                           | 4        | 43,0                         | 9        | 0,2        | 3        |
| Saarland               | 67,7        | 9        | 91,1                      | 8        | 40,0             | 8        | 38,2                        | 1        | 43,7              | 15       | 25,7             | 1        | 61,7                | 4        | 8,9                           | 1        | 42,8                         | 10       | 0,2        | 5        |
| Sachsen                | 69,6        | 6        | 93,0                      | 2        | 43,4             | 4        | 33,5                        | 6        | 53,1              | 6        | 20,5             | 13       | 52,8                | 17       | 6,5                           | 16       | 40,0                         | 13       | 0,1        | 13       |
| Sachsen-Anhalt         | 72,1        | 2        | 92,7                      | 3        | 43,5             | 3        | 32,4                        | 10       | 53,1              | 7        | 24,2             | 2        | 56,3                | 15       | 7,3                           | 10       | 36,8                         | 15       | 0,0        | 14       |
| Schleswig-Holstein     | 68,7        | 8        | 87,4                      | 16       | 35,3             | 15       | 28,9                        | 15       | 44,7              | 13       | 17,4             | 17       | 58,3                | 12       | 8,0                           | 7        | 38,0                         | 14       | 0,1        | 6        |
| Thüringen              | 67,1        | 10       | 93,9                      | 1        | 46,9             | 1        | 34,3                        | 4        | 60,7              | 1        | 23,9             | 3        | 61,9                | 2        | 7,1                           | 14       | 43,9                         | 7        | 0,0        | 16       |
| Westfalen-Lippe        | 66,3        | 11       | 90,3                      | 11       | 41,2             | 7        | 34,6                        | 3        | 48,3              | 8        | 21,0             | 12       | 61,9                | 3        | 8,6                           | 2        | 44,4                         | 6        | 0,1        | 10       |
| <b>Deutschland</b>     | <b>65,3</b> | <b>-</b> | <b>90,6</b>               | <b>-</b> | <b>41,1</b>      | <b>-</b> | <b>32,8</b>                 | <b>-</b> | <b>49,2</b>       | <b>-</b> | <b>21,5</b>      | <b>-</b> | <b>59,9</b>         | <b>-</b> | <b>7,8</b>                    | <b>-</b> | <b>45,8</b>                  | <b>-</b> | <b>0,1</b> | <b>-</b> |

KV: Kassenärztliche Vereinigung



Zusammenhang der Adjustierungsfaktoren und ausgewählter Outcomeindikatoren

**Tabelle B.1-5: Zusammenhang der Patienten- und Wohnkreismerkmale mit dem Outcome „Versterben im Krankenhaus“ und den Gesamtversorgungskosten der letzten drei Lebensmonate für Versicherte mit Palliativversorgung**

|                                           | Sterbeort Krankenhaus |     | Gesamtversorgungskosten (letzte 3 Lebensmonate, ohne Pflegekosten) |     |
|-------------------------------------------|-----------------------|-----|--------------------------------------------------------------------|-----|
|                                           | OR                    | p   | B                                                                  | p   |
| Geschlecht: weiblich                      | 0,68                  | *** | -3.754                                                             | *** |
| Alter                                     | 0,96                  | *** | -494                                                               | *** |
| CCI                                       | 1,11                  | *** | 931                                                                | *** |
| Tumor                                     | 2,20                  | *** | 7.392                                                              | *** |
| Herz-Kreislauf-Erkrankung                 | 0,92                  | *** | -2.705                                                             | *** |
| Herzinsuffizienz                          | 1,09                  | *** | -1.289                                                             | *** |
| Zerebrovaskuläre Erkrankung               | 0,83                  | *** | -1.470                                                             | *** |
| Nierenerkrankung                          | 1,53                  | *** | 2.002                                                              | *** |
| Lebererkrankung                           | 1,67                  | *** | 3.757                                                              | *** |
| Atemwegserkrankung                        | 1,98                  | *** | 4.172                                                              | *** |
| Neurodegenerative Erkrankung              | 0,59                  | *** | -3.587                                                             | *** |
| Demenz, Alzheimer, Senilität              | 0,41                  | *** | -9.023                                                             | *** |
| HIV, AIDS                                 | 1,60                  | **  | 10.131                                                             | *** |
| Pflegebedarf: Häuslichkeit mit Pflegegrad | 0,11                  | *** | -3.413                                                             | *** |
| Pflegebedarf: Pflegeheim                  | 0,04                  | *** | -13.751                                                            | *** |
| Deprivationsgrad                          | 0,77                  | *** | 1.791                                                              | *** |
| Ländlichkeit                              | 1,11                  | *** | 171                                                                | ns  |

Ergebnisse beruhen auf einfachen logistischen (Spalte: Sterbeort Krankenhaus) bzw. linearen (Spalte: Gesamtversorgungskosten) Regressionsmodellen mit der in der Spalte genannten Variable als Outcome und der in der Zeile genannten Variable als einzigem Prädiktor. Ausgewiesen werden Odds Ratios (OR) bzw. Regressionsgewichte (B) sowie die zugehörige Signifikanz (p). \*\*\* p < 0,001; \*\* p < 0,01; \* p < 0,05; ns: nicht signifikant. CCC: Charlson Comorbidity Index

Inanspruchnahme der Formen von Palliativversorgung in der Studienpopulation

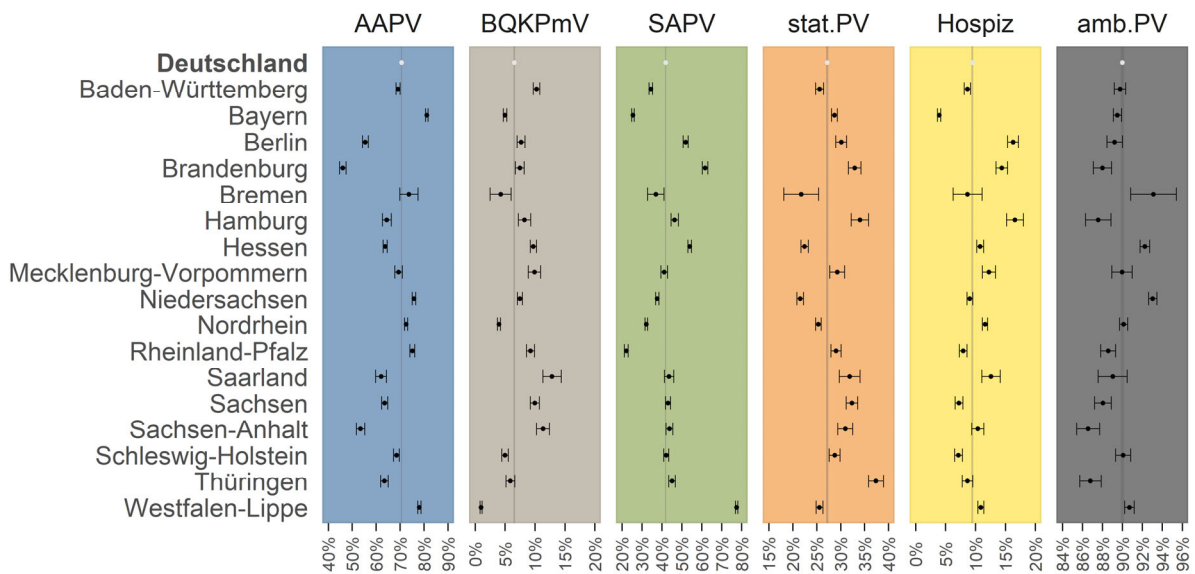

**Abbildung B.1-1: Inanspruchnahme der Hauptversorgungsformen durch Versicherte mit Palliativversorgung (2016-2019) in %**

AAPV: Allgemeine ambulante Palliativversorgung, amb.PV: Ambulante Palliativversorgung, BQKpMv: Besonders qualifizierte und koordinierte palliativmedizinische Versorgung, PV: Palliativversorgung, SAPV: Spezialisierte ambulante Palliativversorgung, stat.PV: Stationäre Palliativversorgung im Krankenhaus  
 Die Inanspruchnahmeraten je KV (+95%-Konfidenzintervall) sind als schwarze Punkte (+Whisker) dargestellt. Als Referenz wird außerdem die Inanspruchnahmerate über alle Versicherte mit Palliativversorgung gezeigt („Deutschland“); die Breite dieser Referenzlinie repräsentiert ihr Konfidenzintervall.

Quelle: eigene Abbildung

**Tabelle B.1-6: Inanspruchnahme der Hauptversorgungsformen durch Versicherte mit Palliativversorgung (2016-2019) in %**

| KV                     | AAPV                      |      | BQKPmV                 |      | SAPV                      |      | stat.PV                   |      | Hospiz                 |      | amb.PV                    |      |
|------------------------|---------------------------|------|------------------------|------|---------------------------|------|---------------------------|------|------------------------|------|---------------------------|------|
|                        | p (CI)                    | Rang | p (CI)                 | Rang | p (CI)                    | Rang | p (CI)                    | Rang | p (CI)                 | Rang | p (CI)                    | Rang |
| Baden-Württemberg      | 69,1 (68,3 - 70,0)        | 8    | 10,2 (9,7 - 10,8)      | 3    | 34,4 (33,5 - 35,3)        | 14   | 25,6 (24,8 - 26,4)        | 12   | 8,6 (8,1 - 9,2)        | 13   | 89,8 (89,2 - 90,3)        | 8    |
| Bayern                 | 81,1 (80,6 - 81,6)        | 1    | 5,0 (4,7 - 5,3)        | 14   | 25,5 (24,9 - 26,0)        | 16   | 28,7 (28,1 - 29,3)        | 11   | 3,9 (3,7 - 4,2)        | 17   | 89,5 (89,1 - 89,9)        | 9    |
| Berlin                 | 55,5 (54,3 - 56,7)        | 15   | 7,7 (7,0 - 8,3)        | 9    | 51,9 (50,7 - 53,1)        | 4    | 30,1 (29,0 - 31,2)        | 7    | 16,3 (15,4 - 17,2)     | 2    | 89,2 (88,4 - 90,0)        | 10   |
| Brandenburg            | 46,1 (44,6 - 47,5)        | 17   | 7,5 (6,7 - 8,2)        | 11   | 61,6 (60,2 - 63,0)        | 2    | 32,9 (31,6 - 34,3)        | 3    | 14,4 (13,4 - 15,3)     | 3    | 88,0 (87,1 - 88,9)        | 14   |
| Bremen                 | 73,7 (69,8 - 77,5)        | 5    | 4,3 (2,5 - 6,0)        | 15   | 36,9 (32,8 - 41,1)        | 13   | 21,8 (18,1 - 25,4)        | 16   | 8,7 (6,2 - 11,1)       | 11   | 93,1 (90,8 - 95,4)        | 1    |
| Hamburg                | 64,4 (62,6 - 66,2)        | 10   | 8,3 (7,2 - 9,3)        | 8    | 46,4 (44,5 - 48,3)        | 5    | 34,0 (32,2 - 35,8)        | 2    | 16,6 (15,2 - 18,0)     | 1    | 87,6 (86,3 - 88,8)        | 15   |
| Hessen                 | 63,7 (62,9 - 64,6)        | 11   | 9,7 (9,2 - 10,2)       | 6    | 54,0 (53,1 - 54,9)        | 3    | 22,5 (21,7 - 23,2)        | 15   | 10,8 (10,2 - 11,3)     | 8    | 92,2 (91,8 - 92,7)        | 3    |
| Mecklenburg-Vorpommern | 69,3 (67,7 - 70,9)        | 7    | 9,9 (8,9 - 10,9)       | 5    | 41,2 (39,5 - 42,9)        | 11   | 29,3 (27,7 - 30,8)        | 8    | 12,2 (11,1 - 13,3)     | 5    | 90,0 (88,9 - 91,0)        | 7    |
| Niedersachsen          | 75,8 (75,0 - 76,5)        | 3    | 7,5 (7,1 - 7,9)        | 10   | 37,6 (36,8 - 38,5)        | 12   | 21,5 (20,8 - 22,2)        | 17   | 9,0 (8,6 - 9,5)        | 10   | 93,0 (92,6 - 93,5)        | 2    |
| Nordrhein              | 72,5 (71,9 - 73,1)        | 6    | 4,0 (3,7 - 4,2)        | 16   | 32,1 (31,5 - 32,8)        | 15   | 25,3 (24,7 - 25,9)        | 14   | 11,6 (11,1 - 12,0)     | 6    | 90,1 (89,7 - 90,5)        | 5    |
| Rheinland-Pfalz        | 75,1 (74,1 - 76,1)        | 4    | 9,2 (8,6 - 9,9)        | 7    | 22,2 (21,2 - 23,1)        | 17   | 29,0 (28,0 - 30,1)        | 9    | 7,9 (7,3 - 8,6)        | 14   | 88,6 (87,8 - 89,3)        | 12   |
| Saarland               | 62,0 (59,8 - 64,3)        | 14   | 12,8 (11,3 - 14,4)     | 1    | 43,6 (41,2 - 45,9)        | 8    | 31,9 (29,7 - 34,0)        | 5    | 12,6 (11,0 - 14,1)     | 4    | 89,0 (87,6 - 90,5)        | 11   |
| Sachsen                | 63,5 (62,3 - 64,8)        | 12   | 10,0 (9,2 - 10,7)      | 4    | 43,0 (41,8 - 44,3)        | 9    | 32,3 (31,1 - 33,5)        | 4    | 7,2 (6,6 - 7,9)        | 15   | 88,0 (87,2 - 88,9)        | 13   |
| Sachsen-Anhalt         | 53,5 (51,8 - 55,2)        | 16   | 11,3 (10,3 - 12,4)     | 2    | 43,8 (42,1 - 45,5)        | 7    | 31,0 (29,4 - 32,5)        | 6    | 10,4 (9,4 - 11,4)      | 9    | 86,6 (85,4 - 87,7)        | 17   |
| Schleswig-Holstein     | 68,4 (67,3 - 69,6)        | 9    | 5,0 (4,5 - 5,5)        | 13   | 42,2 (40,9 - 43,4)        | 10   | 28,8 (27,6 - 29,9)        | 10   | 7,1 (6,5 - 7,8)        | 16   | 90,1 (89,3 - 90,8)        | 6    |
| Thüringen              | 63,5 (61,9 - 65,0)        | 13   | 5,9 (5,1 - 6,6)        | 12   | 45,1 (43,5 - 46,7)        | 6    | 37,4 (35,8 - 38,9)        | 1    | 8,6 (7,8 - 9,5)        | 12   | 86,8 (85,7 - 87,9)        | 16   |
| Westfalen-Lippe        | 78,0 (77,3 - 78,7)        | 2    | 1,0 (0,8 - 1,1)        | 17   | 77,4 (76,7 - 78,1)        | 1    | 25,6 (24,9 - 26,3)        | 13   | 10,9 (10,4 - 11,4)     | 7    | 90,7 (90,2 - 91,2)        | 4    |
| <b>Deutschland</b>     | <b>70,6 (70,4 - 70,9)</b> | -    | <b>6,6 (6,4 - 6,7)</b> | -    | <b>41,9 (41,7 - 42,2)</b> | -    | <b>27,2 (27,0 - 27,4)</b> | -    | <b>9,5 (9,3 - 9,6)</b> | -    | <b>90,0 (89,8 - 90,2)</b> | -    |

AAPV: Allgemeine ambulante Palliativversorgung, amb.PV: Ambulante Palliativversorgung (AAPV, BQKPmV, SAPV), BQKPmV: Besonders qualifizierte und koordinierte palliativmedizinische Versorgung, KV: Kassenärztliche Vereinigung, SAPV: Spezialisierte ambulante Palliativversorgung, stat.PV: Stationäre Palliativversorgung im Krankenhaus

Beginn der Palliativversorgung vor dem Tod

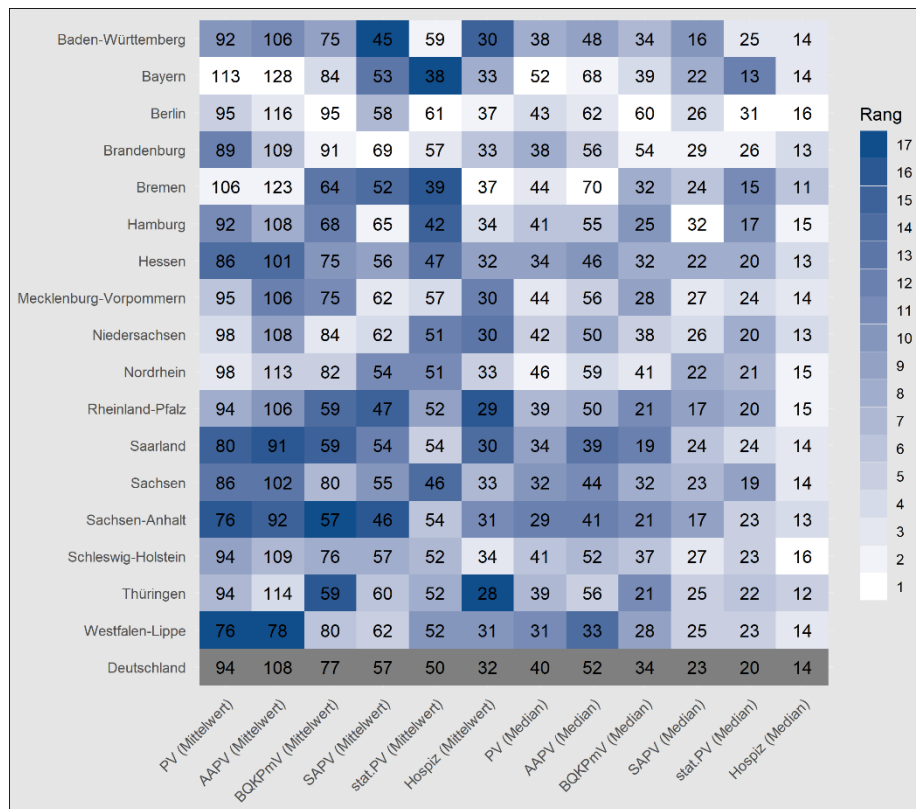

**Abbildung B.1-2: Beginn der jew. Palliativversorgungsform als Anzahl Tage vor dem Tod je KV (Mittelwert und Median)**

AAPV: Allgemeine ambulante Palliativversorgung, BQKpmV: Besonders qualifizierte und koordinierte palliativmedizinische Versorgung, KV: Kassenärztliche Vereinigung, PV: Palliativversorgung, SAPV: Spezialisierte ambulante Palliativversorgung, stat.PV: Stationäre Palliativversorgung im Krankenhaus

Quelle: eigene Abbildung

## B.2 Qualitätsbezogene Outcomes

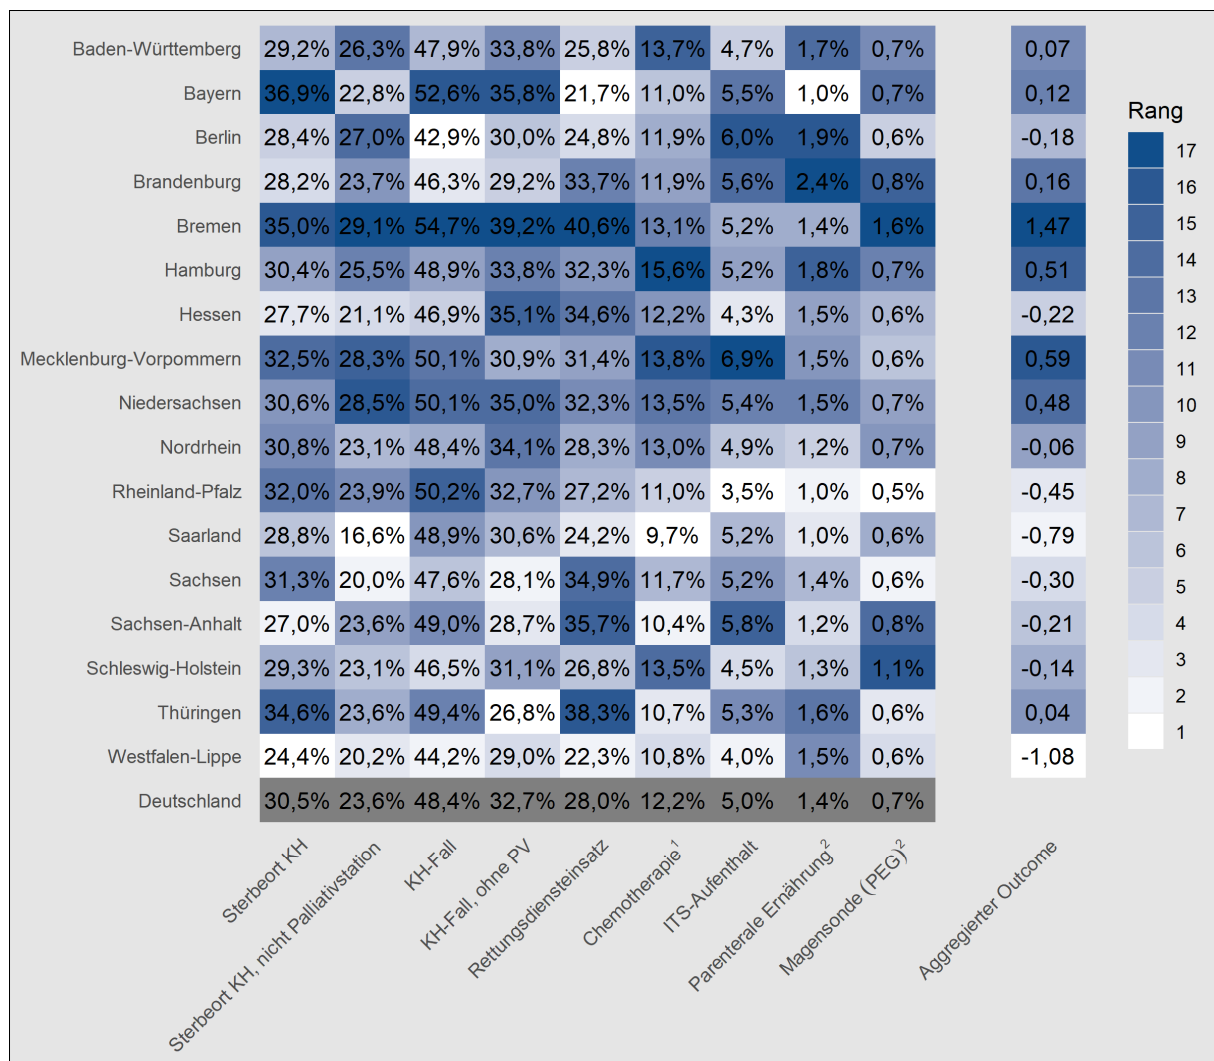

**Abbildung B.2-1: Qualitätsbezogene Outcomeindikatoren je KV für Versicherte mit Palliativversorgung - ADJUSTIERT**

Zeitlicher Bezug der Outcomeindikatoren: innerhalb von 30 Tagen vor dem Tod (Sterbeort: Todesdatum)

ITS: Intensivstation, KH: Krankenhaus, KV: Kassenärztliche Vereinigung, PEG: Perkutan-endoskopische Gastrostomie, PV: Palliativversorgung

<sup>1</sup>Versicherte mit Tumorerkrankung (ICD-10-GM: C00-C97), <sup>2</sup>Versicherte ohne gastrointestinalen Tumor oder gastrointestinale Metastasen (ICD-10-GM: C15-C26, C78.4-C78.8)

Quelle: eigene Abbildung

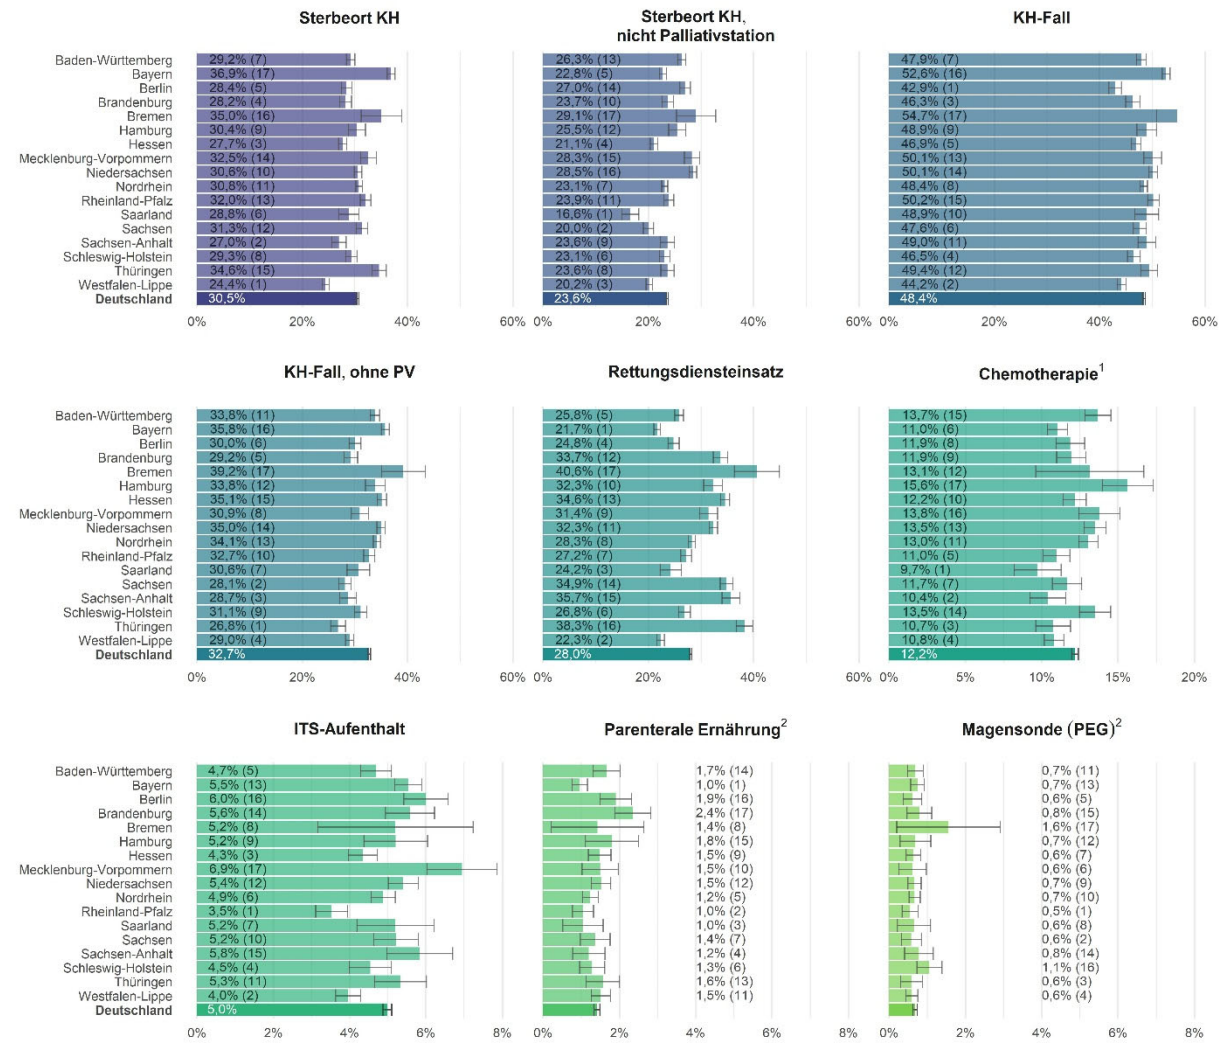

**Abbildung B.2-2: Qualitätsbezogene Outcomeindikatoren je KV für Versicherte mit Palliativversorgung (mit 95%-Konfidenzintervall) - ADJUSTIERT**

Zeitlicher Bezug der Outcomeindikatoren: innerhalb von 30 Tagen vor dem Tod (Sterbeort: Todesdatum)

ITS: Intensivstation, KH: Krankenhaus, KV: Kassenärztliche Vereinigung, PEG: Perkutan-endoskopische Gastrostomie, PV: Palliativversorgung

<sup>1</sup>Versicherte mit Tumorerkrankung (ICD-10-GM: C00-C97), <sup>2</sup>Versicherte ohne gastrointestinalen Tumor oder gastrointestinale Metastasen (ICD-10-GM: C15-C26, C78.4-C78.8)

Quelle: eigene Abbildung

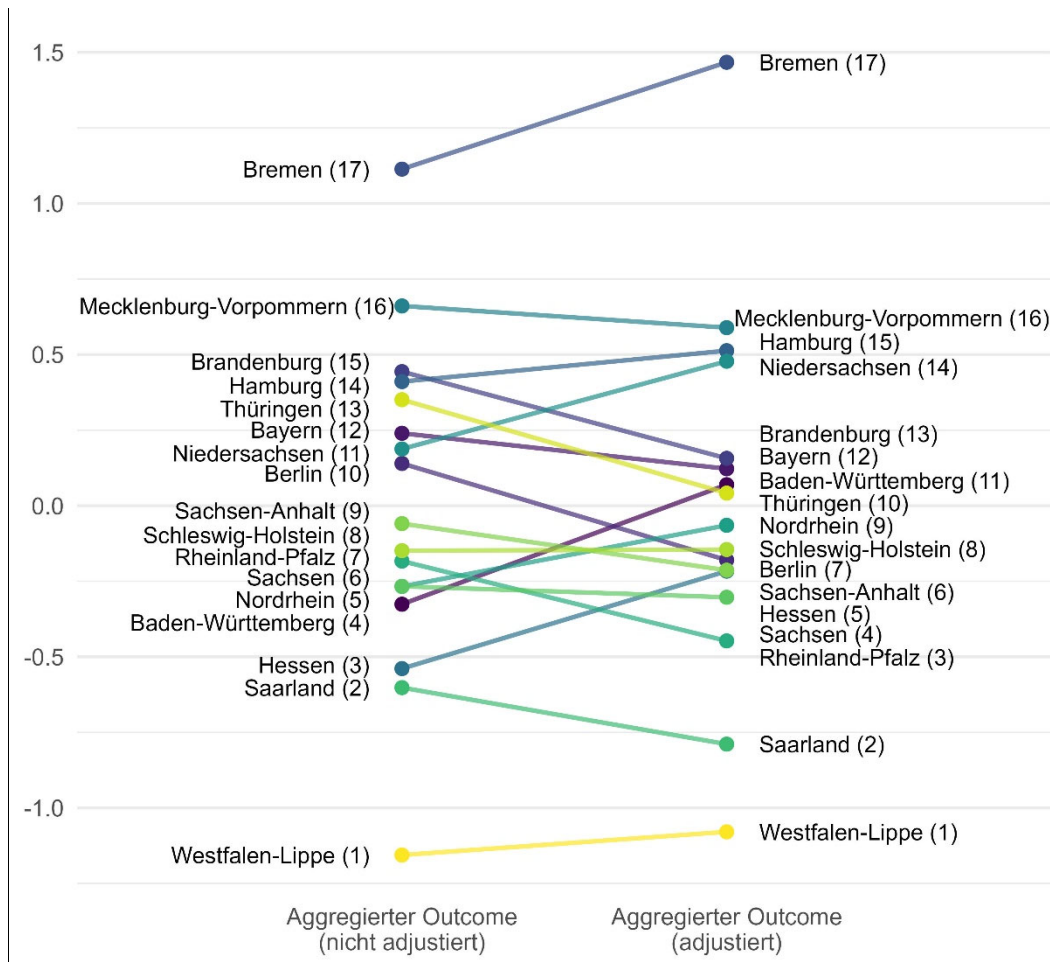

**Abbildung B.2-3: Veränderung des aggregierten Outcomes nach Adjustierung**

Skala: Je geringer die Werte auf dem aggregierten Outcome, desto höher die Versorgungsqualität. Negative Werte auf dem aggregierten Outcome legen nahe, dass die jeweilige KV besser als der Bundesschnitt liegt. Ein Abfall des aggregierten Outcomes nach Adjustierung legt nahe, dass die Versorgungsqualität besser ausfällt, wenn man um Patienten- und Wohnkreismerkmale adjustiert. Der Rang jeder KV wird in Klammern ausgewiesen.

Quelle: eigene Abbildung

### B.3 Gesamtversorgungskosten der letzten drei Lebensmonate

**Tabelle B.3-1: Gesamtversorgungskosten sowie Pflegekosten der drei letzten Lebensmonate je KV je Versichertem mit Palliativversorgung (Euro, MW, S)**

| KV                     | Ambulante ärztliche Versorgung |                | HKP              |                  | Krankenhaus        |                   | Rettungsdienst |              | Kranken-transport |              | Hospiz           |                | Arzneimittel     |                  | Heilmittel   |              | Hilfsmittel    |                | Gesamt-versorgungs-kosten |                    | Pflegeleistungen <sup>1</sup> |                  |
|------------------------|--------------------------------|----------------|------------------|------------------|--------------------|-------------------|----------------|--------------|-------------------|--------------|------------------|----------------|------------------|------------------|--------------|--------------|----------------|----------------|---------------------------|--------------------|-------------------------------|------------------|
|                        | MW (S)                         | Rang           | MW (S)           | Rang             | MW (S)             | Rang              | MW (S)         | Rang         | MW (S)            | Rang         | MW (S)           | Rang           | MW (S)           | Rang             | MW (S)       | Rang         | MW (S)         | Rang           | MW (S)                    | Rang               | MW (S)                        | Rang             |
|                        | Baden-Württemberg              | 982<br>(1.381) | 10               | 1.096<br>(3.502) | 7                  | 7.942<br>(10.891) | 3              | 348<br>(650) | 7                 | 293<br>(655) | 7                | 465<br>(2.683) | 10               | 2.478<br>(5.167) | 7            | 138<br>(331) | 9              | 707<br>(1.445) | 8                         | 14.451<br>(14.029) | 4                             | 3.708<br>(2.508) |
| Bayern                 | 1.068<br>(1.349)               | 12             | 1.069<br>(3.333) | 5                | 8.863<br>(12.624)  | 12                | 343<br>(570)   | 4            | 230<br>(518)      | 2            | 202<br>(1.736)   | 1              | 1.953<br>(4.360) | 1                | 120<br>(319) | 6            | 595<br>(1.092) | 2              | 14.444<br>(14.847)        | 3                  | 3.434<br>(2.574)              | 10               |
| Berlin                 | 1.272<br>(1.351)               | 15             | 904<br>(3.668)   | 3                | 10.115<br>(16.675) | 17                | 231<br>(376)   | 1            | 291<br>(576)      | 6            | 1.013<br>(3.964) | 17             | 2.820<br>(5.365) | 13               | 269<br>(591) | 17           | 690<br>(1.318) | 7              | 17.605<br>(18.593)        | 16                 | 3.261<br>(2.476)              | 4                |
| Brandenburg            | 756<br>(1.240)                 | 1              | 2.057<br>(4.150) | 17               | 9.402<br>(11.953)  | 15                | 542<br>(771)   | 15           | 319<br>(631)      | 12           | 642<br>(2.918)   | 15             | 3.229<br>(5.944) | 17               | 119<br>(328) | 5            | 886<br>(1.402) | 16             | 17.951<br>(14.926)        | 17                 | 3.252<br>(2.407)              | 3                |
| Bremen                 | 813<br>(1.102)                 | 3              | 1.200<br>(2.932) | 10               | 7.543<br>(8.429)   | 1                 | 375<br>(525)   | 11           | 246<br>(500)      | 3            | 390<br>(2.408)   | 6              | 2.145<br>(4.766) | 2                | 117<br>(256) | 3            | 516<br>(782)   | 1              | 13.346<br>(11.102)        | 1                  | 3.474<br>(2.393)              | 12               |
| Hamburg                | 1.186<br>(1.524)               | 14             | 1.880<br>(3.971) | 16               | 8.790<br>(12.479)  | 11                | 361<br>(488)   | 8            | 366<br>(731)      | 16           | 867<br>(3.518)   | 16             | 2.897<br>(5.159) | 14               | 184<br>(428) | 16           | 717<br>(1.308) | 12             | 17.247<br>(15.142)        | 15                 | 3.366<br>(2.549)              | 9                |
| Hessen                 | 807<br>(1.186)                 | 2              | 1.855<br>(3.902) | 15               | 8.134<br>(11.386)  | 4                 | 552<br>(773)   | 17           | 230<br>(582)      | 1            | 524<br>(2.759)   | 11             | 2.570<br>(5.764) | 10               | 103<br>(278) | 1            | 714<br>(1.385) | 11             | 15.487<br>(14.696)        | 8                  | 3.471<br>(2.422)              | 11               |
| Mecklenburg-Vorpommern | 939<br>(1.323)                 | 8              | 1.319<br>(3.917) | 12               | 9.208<br>(14.071)  | 14                | 547<br>(817)   | 16           | 362<br>(785)      | 15           | 425<br>(2.062)   | 7              | 2.940<br>(5.042) | 15               | 155<br>(360) | 15           | 937<br>(1.717) | 17             | 16.832<br>(16.227)        | 14                 | 3.324<br>(2.369)              | 6                |
| Niedersachsen          | 1.070<br>(1.479)               | 13             | 1.168<br>(3.238) | 9                | 7.594<br>(10.863)  | 2                 | 422<br>(673)   | 12           | 379<br>(733)      | 17           | 387<br>(2.294)   | 5              | 2.546<br>(4.963) | 8                | 141<br>(366) | 11           | 652<br>(1.260) | 6              | 14.358<br>(13.737)        | 2                  | 3.722<br>(2.419)              | 15               |
| Nordrhein              | 2.401<br>(4.115)               | 17             | 538<br>(3.097)   | 1                | 8.539<br>(12.450)  | 9                 | 361<br>(586)   | 9            | 308<br>(608)      | 10           | 535<br>(2.647)   | 13             | 2.470<br>(4.817) | 6                | 139<br>(343) | 10           | 637<br>(1.149) | 4              | 15.928<br>(15.182)        | 13                 | 3.814<br>(2.494)              | 17               |
| Rheinland-Pfalz        | 945<br>(1.332)                 | 9              | 994<br>(3.449)   | 4                | 8.527<br>(11.008)  | 8                 | 336<br>(533)   | 3            | 284<br>(607)      | 5            | 429<br>(2.484)   | 8              | 2.395<br>(5.078) | 5                | 131<br>(315) | 7            | 616<br>(1.083) | 3              | 14.656<br>(13.788)        | 6                  | 3.334<br>(2.469)              | 7                |
| Saarland               | 997<br>(1.565)                 | 11             | 1.304<br>(3.174) | 11               | 8.993<br>(12.663)  | 13                | 306<br>(498)   | 2            | 312<br>(768)      | 11           | 553<br>(2.642)   | 14             | 2.559<br>(5.812) | 9                | 138<br>(325) | 8            | 645<br>(1.311) | 5              | 15.807<br>(15.781)        | 10                 | 3.178<br>(2.370)              | 2                |
| Sachsen                | 849<br>(1.207)                 | 5              | 1.073<br>(3.299) | 6                | 8.787<br>(12.038)  | 10                | 344<br>(498)   | 6            | 324<br>(596)      | 14           | 301<br>(1.943)   | 2              | 2.629<br>(5.389) | 11               | 145<br>(333) | 14           | 800<br>(1.376) | 14             | 15.254<br>(14.566)        | 7                  | 3.356<br>(2.422)              | 8                |
| Sachsen-Anhalt         | 893<br>(1.367)                 | 6              | 1.352<br>(3.970) | 13               | 8.308<br>(10.417)  | 5                 | 464<br>(673)   | 14           | 321<br>(639)      | 13           | 452<br>(2.387)   | 9              | 2.941<br>(5.213) | 16               | 143<br>(335) | 13           | 721<br>(1.290) | 13             | 15.595<br>(13.315)        | 9                  | 3.476<br>(2.455)              | 13               |
| Schleswig-Holstein     | 901<br>(1.259)                 | 7              | 1.774<br>(4.032) | 14               | 8.488<br>(11.896)  | 7                 | 456<br>(735)   | 13           | 263<br>(563)      | 4            | 360<br>(2.161)   | 4              | 2.806<br>(5.540) | 12               | 141<br>(342) | 12           | 708<br>(1.241) | 9              | 15.897<br>(14.644)        | 12                 | 2.957<br>(2.404)              | 1                |
| Thüringen              | 842<br>(1.496)                 | 4              | 1.164<br>(3.847) | 8                | 9.618<br>(12.149)  | 16                | 343<br>(464)   | 5            | 306<br>(651)      | 8            | 337<br>(1.928)   | 3              | 2.248<br>(4.213) | 3                | 113<br>(281) | 2            | 845<br>(1.556) | 15             | 15.817<br>(14.379)        | 11                 | 3.283<br>(2.400)              | 5                |
| Westfalen-Lippe        | 1.448<br>(1.414)               | 16             | 550<br>(3.119)   | 2                | 8.309<br>(11.437)  | 6                 | 368<br>(654)   | 10           | 307<br>(597)      | 9            | 534<br>(2.678)   | 12             | 2.257<br>(4.328) | 4                | 118<br>(294) | 4            | 709<br>(1.139) | 10             | 14.599<br>(13.795)        | 5                  | 3.751<br>(2.558)              | 16               |



Onlinematerial zum Beitrag „Ergebnisqualität und Kosten der allgemeinen und spezialisierten Palliativversorgung in Deutschland im regionalen Vergleich: eine GKV-Routinedatenstudie“

| KV          | Ambulante ärztliche Versorgung |      | HKP              |      | Krankenhaus       |      | Rettungsdienst |      | Kranken-transport |      | Hospiz         |      | Arzneimittel     |      | Heilmittel   |      | Hilfsmittel    |      | Gesamt-versorgungs-kosten |      | Pflegeleistungen <sup>1</sup> |      |
|-------------|--------------------------------|------|------------------|------|-------------------|------|----------------|------|-------------------|------|----------------|------|------------------|------|--------------|------|----------------|------|---------------------------|------|-------------------------------|------|
|             | MW (S)                         | Rang | MW (S)           | Rang | MW (S)            | Rang | MW (S)         | Rang | MW (S)            | Rang | MW (S)         | Rang | MW (S)           | Rang | MW (S)       | Rang | MW (S)         | Rang | MW (S)                    | Rang | MW (S)                        | Rang |
| Deutschland | 1.237<br>(2.078)               | -    | 1.103<br>(3.502) | -    | 8.547<br>(12.112) | -    | 388<br>(631)   | -    | 294<br>(618)      | -    | 459<br>(2.528) | -    | 2.465<br>(4.999) | -    | 137<br>(346) | -    | 687<br>(1.263) | -    | 15.317<br>(14.757)        | -    | 3.522<br>(2.493)              | -    |

HKP: Häusliche Krankenpflege (SGB V), KV: Kassenärztliche Vereinigung, MW: Mittelwert, S: Standardabweichung, SGB XI: Sozialgesetzbuch XI

<sup>1</sup>Kosten der Pflegeleistungen nur für die Subpopulation der Verstorbenen aus 2018 und 2019 verfügbar; Grundgesamtheit reduziert sich hier auf Verstorbene aus 2018 und 2019.

**Tabelle B.3-2: Gesamtversorgungskosten sowie Pflegekosten der letzten drei Lebensmonate je KV je Versichertem mit Palliativversorgung (Euro, Median, IQA)**

| KV                     | Ambulante ärztliche Versorgung |      | HKP              |      | Krankenhaus       |      | Rettungsdienst |      | Kranken-transport |      | Hospiz       |      | Arzneimittel   |      | Heilmittel   |      | Hilfsmittel    |      | Gesamt-versorgungs-kosten |      | Pflegeleistungen <sup>1</sup> |      |
|------------------------|--------------------------------|------|------------------|------|-------------------|------|----------------|------|-------------------|------|--------------|------|----------------|------|--------------|------|----------------|------|---------------------------|------|-------------------------------|------|
|                        | Median (IQA)                   | Rang | Median (IQA)     | Rang | Median (IQA)      | Rang | Median (IQA)   | Rang | Median (IQA)      | Rang | Median (IQA) | Rang | Median (IQA)   | Rang | Median (IQA) | Rang | Median (IQA)   | Rang | Median (IQA)              | Rang | Median (IQA)                  | Rang |
| Baden-Württemberg      | 651<br>(620)                   | 11   | 19<br>(1.483)    | 3    | 4.790<br>(10.985) | 2    | 0<br>(478)     | 1    | 117<br>(317)      | 8    | 0<br>(0)     | 1    | 718<br>(1.527) | 3    | 0<br>(127)   | 1    | 238<br>(763)   | 6    | 10.542<br>(15.399)        | 2    | 3.543<br>(4.406)              | 14   |
| Bayern                 | 756<br>(712)                   | 14   | 0<br>(907)       | 1    | 5.402<br>(11.321) | 7    | 0<br>(745)     | 1    | 92<br>(240)       | 2    | 0<br>(0)     | 1    | 594<br>(1.067) | 2    | 0<br>(91)    | 1    | 200<br>(671)   | 2    | 10.393<br>(14.887)        | 1    | 3.233<br>(4.798)              | 11   |
| Berlin                 | 953<br>(1.028)                 | 15   | 0<br>(614)       | 1    | 6.189<br>(12.372) | 15   | 0<br>(319)     | 1    | 131<br>(314)      | 10   | 0<br>(0)     | 1    | 813<br>(2.063) | 12   | 0<br>(297)   | 1    | 288<br>(787)   | 9    | 13.427<br>(16.803)        | 15   | 2.978<br>(4.352)              | 5    |
| Brandenburg            | 454<br>(502)                   | 1    | 1.019<br>(2.666) | 12   | 6.464<br>(11.631) | 16   | 181<br>(866)   | 3    | 103<br>(349)      | 5    | 0<br>(0)     | 1    | 879<br>(2.436) | 13   | 0<br>(85)    | 1    | 405<br>(1.026) | 17   | 14.493<br>(16.497)        | 17   | 2.888<br>(3.973)              | 3    |
| Bremen                 | 540<br>(535)                   | 3    | 83<br>(1.037)    | 4    | 5.044<br>(9.717)  | 4    | 297<br>(594)   | 6    | 100<br>(285)      | 4    | 0<br>(0)     | 1    | 585<br>(978)   | 1    | 0<br>(111)   | 1    | 199<br>(614)   | 1    | 10.847<br>(14.692)        | 4    | 3.117<br>(4.024)              | 10   |
| Hamburg                | 754<br>(887)                   | 13   | 205<br>(1.912)   | 7    | 5.768<br>(10.341) | 14   | 0<br>(463)     | 1    | 177<br>(417)      | 17   | 0<br>(0)     | 1    | 880<br>(2.131) | 14   | 0<br>(180)   | 1    | 264<br>(786)   | 7    | 13.644<br>(16.418)        | 16   | 3.023<br>(4.642)              | 7    |
| Hessen                 | 543<br>(524)                   | 4    | 791<br>(2.243)   | 11   | 4.842<br>(10.810) | 3    | 406<br>(800)   | 7    | 76<br>(210)       | 1    | 0<br>(0)     | 1    | 756<br>(1.540) | 8    | 0<br>(62)    | 1    | 294<br>(788)   | 11   | 11.925<br>(15.412)        | 8    | 3.236<br>(4.168)              | 12   |
| Mecklenburg-Vorpommern | 612<br>(621)                   | 8    | 117<br>(1.269)   | 6    | 5.710<br>(10.387) | 12   | 0<br>(930)     | 1    | 148<br>(362)      | 14   | 0<br>(0)     | 1    | 988<br>(2.369) | 17   | 0<br>(157)   | 1    | 357<br>(1.029) | 16   | 13.081<br>(15.038)        | 14   | 2.995<br>(3.879)              | 6    |
| Niedersachsen          | 696<br>(687)                   | 12   | 15<br>(1.216)    | 2    | 4.722<br>(9.965)  | 1    | 0<br>(622)     | 1    | 167<br>(431)      | 16   | 0<br>(0)     | 1    | 731<br>(1.582) | 7    | 0<br>(124)   | 1    | 224<br>(712)   | 4    | 10.835<br>(14.260)        | 3    | 3.611<br>(4.295)              | 16   |
| Nordrhein              | 974<br>(1.645)                 | 16   | 0<br>(125)       | 1    | 5.392<br>(10.989) | 6    | 0<br>(567)     | 1    | 138<br>(359)      | 13   | 0<br>(0)     | 1    | 775<br>(1.619) | 9    | 0<br>(115)   | 1    | 237<br>(723)   | 5    | 12.388<br>(16.168)        | 11   | 3.689<br>(4.346)              | 17   |
| Rheinland-Pfalz        | 622<br>(607)                   | 10   | 0<br>(724)       | 1    | 5.642<br>(11.125) | 11   | 0<br>(587)     | 1    | 111<br>(301)      | 6    | 0<br>(0)     | 1    | 718<br>(1.415) | 4    | 0<br>(113)   | 1    | 219<br>(698)   | 3    | 11.394<br>(15.427)        | 6    | 3.080<br>(4.234)              | 8    |

Onlinematerial zum Beitrag „Ergebnisqualität und Kosten der allgemeinen und spezialisierten Palliativversorgung in Deutschland im regionalen Vergleich: eine GKV-Routinedatenstudie“

| KV                 | Ambulante ärztliche Versorgung |      | HKP                  |      | Krankenhaus               |      | Rettungsdienst     |      | Krankentransport     |      | Hospiz           |      | Arzneimittel           |      | Heilmittel         |      | Hilfsmittel          |      | Gesamtversorgungskosten    |      | Pflegeleistungen <sup>1</sup> |      |
|--------------------|--------------------------------|------|----------------------|------|---------------------------|------|--------------------|------|----------------------|------|------------------|------|------------------------|------|--------------------|------|----------------------|------|----------------------------|------|-------------------------------|------|
|                    | Median (IQA)                   | Rang | Median (IQA)         | Rang | Median (IQA)              | Rang | Median (IQA)       | Rang | Median (IQA)         | Rang | Median (IQA)     | Rang | Median (IQA)           | Rang | Median (IQA)       | Rang | Median (IQA)         | Rang | Median (IQA)               | Rang | Median (IQA)                  | Rang |
| Saarland           | 616<br>(616)                   | 9    | 0<br>(1.375)         | 1    | 5.737<br>(10.061)         | 13   | 0<br>(441)         | 1    | 115<br>(317)         | 7    | 0<br>(0)         | 1    | 883<br>(1.685)         | 15   | 0<br>(112)         | 1    | 311<br>(802)         | 15   | 12.077<br>(14.876)         | 9    | 2.847<br>(3.870)              | 2    |
| Sachsen            | 562<br>(558)                   | 5    | 318<br>(1.586)       | 9    | 5.604<br>(10.579)         | 10   | 156<br>(515)       | 2    | 153<br>(370)         | 15   | 0<br>(0)         | 1    | 777<br>(1.725)         | 10   | 0<br>(141)         | 1    | 289<br>(849)         | 10   | 11.545<br>(15.062)         | 7    | 3.094<br>(4.237)              | 9    |
| Sachsen-Anhalt     | 567<br>(567)                   | 6    | 424<br>(1.462)       | 10   | 5.475<br>(9.619)          | 9    | 215<br>(684)       | 4    | 126<br>(351)         | 9    | 0<br>(0)         | 1    | 893<br>(2.170)         | 16   | 0<br>(132)         | 1    | 298<br>(776)         | 12   | 12.430<br>(14.991)         | 12   | 3.309<br>(4.133)              | 13   |
| Schleswig-Holstein | 602<br>(576)                   | 7    | 103<br>(2.065)       | 5    | 5.213<br>(10.951)         | 5    | 0<br>(743)         | 1    | 99<br>(278)          | 3    | 0<br>(0)         | 1    | 778<br>(1.859)         | 11   | 0<br>(129)         | 1    | 309<br>(795)         | 14   | 12.515<br>(16.102)         | 13   | 2.631<br>(4.079)              | 1    |
| Thüringen          | 531<br>(486)                   | 2    | 229<br>(1.730)       | 8    | 6.482<br>(11.028)         | 17   | 227<br>(552)       | 5    | 133<br>(327)         | 11   | 0<br>(0)         | 1    | 727<br>(1.479)         | 5    | 0<br>(92)          | 1    | 280<br>(942)         | 8    | 12.306<br>(15.786)         | 10   | 2.977<br>(4.029)              | 4    |
| Westfalen-Lippe    | 1.154<br>(871)                 | 17   | 0<br>(318)           | 1    | 5.412<br>(11.222)         | 8    | 0<br>(558)         | 1    | 133<br>(362)         | 12   | 0<br>(0)         | 1    | 730<br>(1.352)         | 6    | 0<br>(92)          | 1    | 304<br>(800)         | 13   | 11.116<br>(14.627)         | 5    | 3.608<br>(4.466)              | 15   |
| <b>Deutschland</b> | <b>725<br/>(812)</b>           | -    | <b>0<br/>(1.196)</b> | -    | <b>5.366<br/>(10.945)</b> | -    | <b>0<br/>(635)</b> | -    | <b>118<br/>(322)</b> | -    | <b>0<br/>(0)</b> | -    | <b>735<br/>(1.545)</b> | -    | <b>0<br/>(114)</b> | -    | <b>258<br/>(768)</b> | -    | <b>11.654<br/>(15.474)</b> | -    | <b>3.312<br/>(4.435)</b>      | -    |

HKP: Häusliche Krankenpflege (SGB V), IQA: Interquartilsabstand, KV: Kassenärztliche Vereinigung, SGB XI: Sozialgesetzbuch XI

<sup>1</sup>Kosten der Pflegeleistungen nur für die Subpopulation der Verstorbenen aus 2018 und 2019 verfügbar; Grundgesamtheit reduziert sich hier auf Verstorbene aus 2018 und 2019.

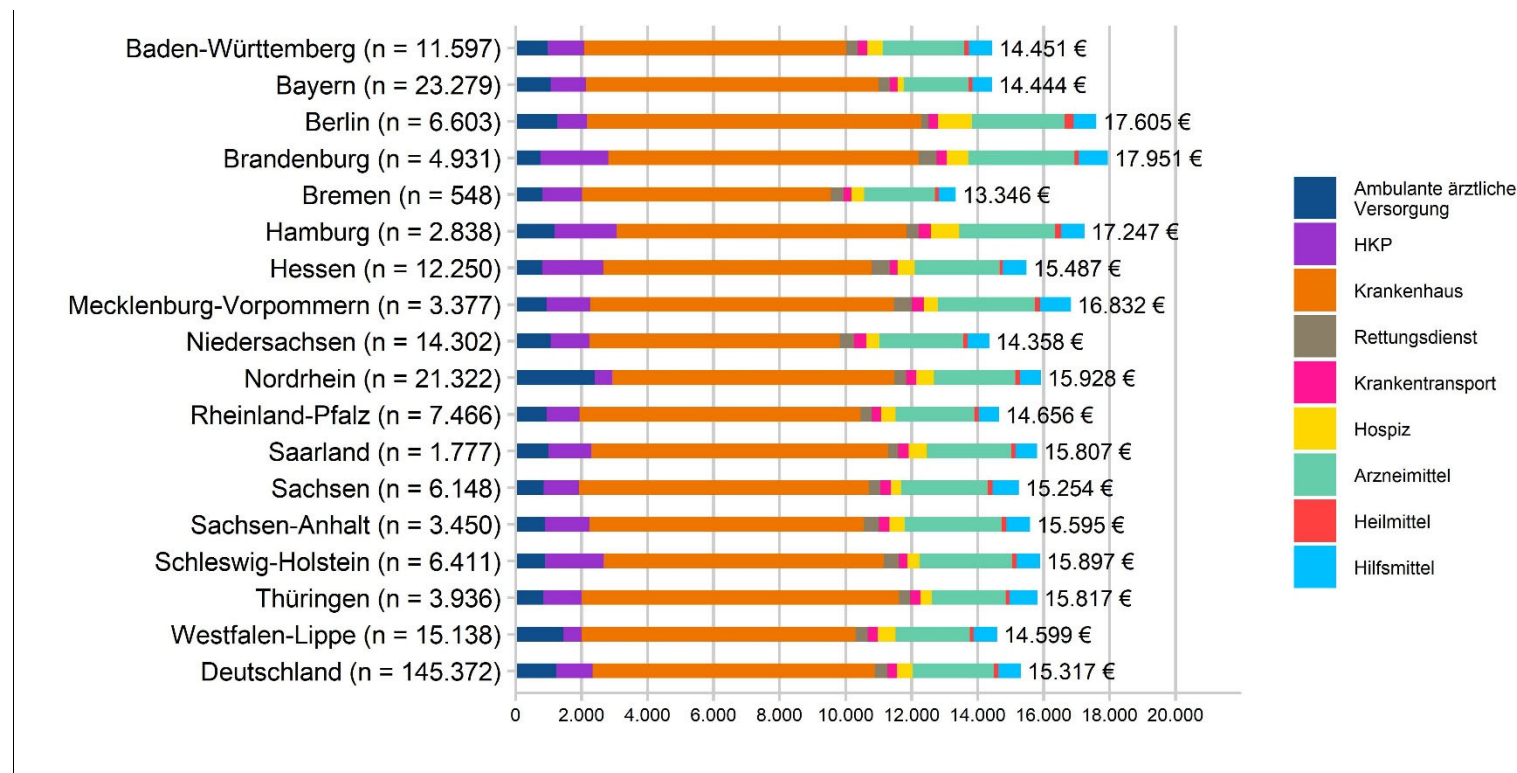

**Abbildung B.3-1: Gesamtversorgungskosten der letzten drei Lebensmonate nach Leistungsbereichen je KV je Versichertem mit Palliativversorgung**

Berücksichtigte Leistungssektoren: Ambulante ärztliche Versorgung, HKP (Häusliche Krankenpflege, SGB V), Krankenhaus, Rettungsdienst, Krankentransport, Hospiz, Arzneimittel, Heilmittel, Hilfsmittel, exkl. SGB XI-Pflege. Darin enthalten sind auch die Palliativversorgungskosten der letzten drei Lebensmonate. KV: Kassenärztliche Vereinigung  
 Quelle: eigene Abbildung

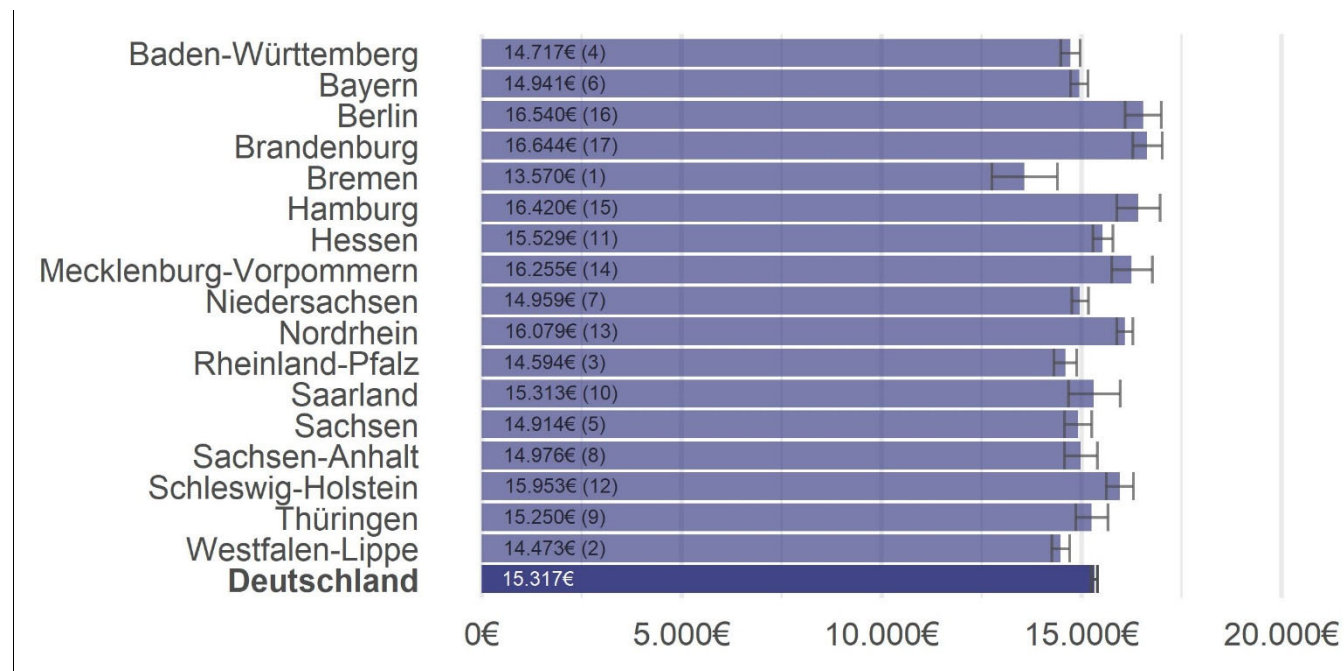

**Abbildung B.3-2: Gesamtversorgungskosten der letzten drei Lebensmonate je KV je Versichertem mit Palliativversorgung (Mittelwert (Rang), 95%-Konfidenzintervall) - ADJUSTIERT**

*KV: Kassenärztliche Vereinigung*

*Quelle: eigene Abbildung*

## B.4 Palliativversorgungskosten des letzten Lebensjahres

### Palliativversorgungskosten je Versichertem mit Palliativversorgung

**Tabelle B.4-1: Palliativversorgungskosten des letzten Lebensjahres je KV je Versichertem mit Palliativversorgung (Euro, MW, S)**

| KV                     | AAPV             |      | BQKPmV         |      | SAPV                 |      | HKPpall         |      | HKP_aP             |      | stat.PV            |      | Hospiz             |      | PV <sup>1</sup>      |      | HKP gesamt            |      |
|------------------------|------------------|------|----------------|------|----------------------|------|-----------------|------|--------------------|------|--------------------|------|--------------------|------|----------------------|------|-----------------------|------|
|                        | MW (S)           | Rang | MW (S)         | Rang | MW (S)               | Rang | MW (S)          | Rang | MW (S)             | Rang | MW (S)             | Rang | MW (S)             | Rang | MW (S)               | Rang | MW (S)                | Rang |
| Baden-Württemberg      | 78 (113)         | 10   | 19 (74)        | 11   | 772 (1.513)          | 3    | 0 (0)           | 1    | 167 (1.994)        | 9    | 660 (2.140)        | 14   | 568 (3.834)        | 9    | 2.263 (5.371)        | 7    | 1.446 (11.629)        | 10   |
| Bayern                 | 113 (154)        | 15   | 9 (65)         | 5    | 842 (1.955)          | 5    | 0 (67)          | 6    | 156 (1.817)        | 8    | 764 (2.202)        | 16   | 256 (2.653)        | 1    | 2.141 (4.653)        | 4    | 1.245 (10.599)        | 7    |
| Berlin                 | 77 (139)         | 9    | 16 (70)        | 10   | 1.061 (2.493)        | 10   | 0 (15)          | 5    | 200 (2.005)        | 15   | 559 (1.255)        | 9    | 1.307 (6.419)      | 17   | 3.219 (7.769)        | 13   | 1.781 (12.039)        | 16   |
| Brandenburg            | 45 (88)          | 2    | 13 (56)        | 6    | 2.516 (4.485)        | 17   | 0 (10)          | 3    | 190 (2.109)        | 13   | 599 (1.415)        | 10   | 866 (5.131)        | 15   | 4.228 (7.724)        | 16   | 1.640 (13.171)        | 13   |
| Bremen                 | 73 (105)         | 8    | 7 (40)         | 2    | 1.031 (2.985)        | 8    | 0 (0)           | 1    | 124 (1.130)        | 4    | 289 (825)          | 1    | 559 (4.784)        | 8    | 2.083 (6.152)        | 2    | 994 (3.654)           | 2    |
| Hamburg                | 96 (162)         | 14   | 16 (68)        | 9    | 2.241 (6.009)        | 16   | 0 (0)           | 1    | 69 (673)           | 1    | 810 (2.051)        | 17   | 1.090 (5.068)      | 16   | 4.322 (8.639)        | 17   | 1.053 (8.087)         | 3    |
| Hessen                 | 63 (109)         | 5    | 21 (88)        | 14   | 1.877 (3.369)        | 14   | 0 (7)           | 2    | 186 (2.146)        | 11   | 460 (1.512)        | 5    | 657 (4.056)        | 12   | 3.265 (6.602)        | 14   | 1.285 (10.317)        | 8    |
| Mecklenburg-Vorpommern | 71 (106)         | 7    | 20 (88)        | 12   | 1.034 (2.684)        | 9    | 0 (0)           | 1    | 233 (1.793)        | 17   | 412 (937)          | 3    | 545 (3.349)        | 7    | 2.315 (4.977)        | 8    | 2.005 (13.155)        | 17   |
| Niedersachsen          | 84 (122)         | 12   | 15 (73)        | 8    | 1.259 (3.483)        | 11   | 0 (33)          | 4    | 126 (1.588)        | 5    | 387 (1.316)        | 2    | 476 (3.397)        | 5    | 2.348 (5.620)        | 10   | 1.146 (9.754)         | 6    |
| Nordrhein              | 339 (704)        | 17   | 8 (46)         | 3    | 1.813 (5.807)        | 13   | 111 (916)       | 9    | 168 (1.943)        | 10   | 659 (2.139)        | 13   | 682 (4.123)        | 13   | 3.780 (8.191)        | 15   | 1.427 (9.723)         | 9    |
| Rheinland-Pfalz        | 88 (139)         | 13   | 22 (93)        | 15   | 868 (3.277)          | 6    | 1 (55)          | 7    | 137 (1.580)        | 6    | 723 (2.080)        | 15   | 493 (3.208)        | 6    | 2.331 (5.611)        | 9    | 1.110 (9.418)         | 4    |
| Saarland               | 62 (112)         | 4    | 35 (132)       | 17   | 1.524 (3.804)        | 12   | 0 (0)           | 1    | 77 (1.679)         | 2    | 465 (963)          | 6    | 699 (4.048)        | 14   | 2.862 (6.299)        | 11   | 528 (5.442)           | 1    |
| Sachsen                | 65 (99)          | 6    | 21 (93)        | 13   | 673 (922)            | 2    | 0 (0)           | 1    | 188 (1.658)        | 12   | 495 (1.077)        | 7    | 374 (2.923)        | 2    | 1.816 (3.841)        | 1    | 1.643 (10.885)        | 14   |
| Sachsen-Anhalt         | 44 (68)          | 1    | 23 (79)        | 16   | 965 (2.626)          | 7    | 2 (92)          | 8    | 191 (1.508)        | 14   | 433 (909)          | 4    | 581 (3.788)        | 10   | 2.237 (5.043)        | 5    | 1.566 (9.687)         | 11   |
| Schleswig-Holstein     | 79 (137)         | 11   | 8 (52)         | 4    | 1.915 (4.379)        | 15   | 0 (0)           | 1    | 120 (1.735)        | 3    | 623 (1.749)        | 11   | 447 (3.282)        | 4    | 3.192 (6.577)        | 12   | 1.120 (10.174)        | 5    |
| Thüringen              | 61 (88)          | 3    | 13 (66)        | 7    | 809 (1.075)          | 4    | 0 (0)           | 1    | 223 (3.510)        | 16   | 645 (1.486)        | 12   | 386 (2.511)        | 3    | 2.137 (4.907)        | 3    | 1.644 (12.665)        | 15   |
| Westfalen-Lippe        | 145 (224)        | 16   | 2 (35)         | 1    | 572 (596)            | 1    | 188 (1.081)     | 10   | 153 (1.713)        | 7    | 558 (1.732)        | 8    | 635 (3.633)        | 11   | 2.253 (4.831)        | 6    | 1.608 (10.853)        | 12   |
| <b>Deutschland</b>     | <b>126 (314)</b> | -    | <b>13 (69)</b> | -    | <b>1.230 (3.449)</b> | -    | <b>36 (500)</b> | -    | <b>162 (1.888)</b> | -    | <b>598 (1.801)</b> | -    | <b>573 (3.799)</b> | -    | <b>2.737 (6.177)</b> | -    | <b>1.384 (10.591)</b> | -    |

AAPV: Allgemeine ambulante Palliativversorgung, BQKPmV: Besonders qualifizierte und koordinierte palliativmedizinische Versorgung, HKP: Häusliche Krankenpflege (SGB V), HKP gesamt: sämtliche HKP-Leistungen des letzten Lebensjahres (nachrichtlich), HKPpall: palliative HKP-Leistungen, HKP\_aP: HKP-Leistungen ab erster ambulanter Palliativleistung, KV: Kassenärztliche Vereinigung, MW: Mittelwert, PV: Palliativversorgung, S: Standardabweichung, SAPV: Spezialisierte ambulante Palliativversorgung, stat.PV: stationäre Palliativversorgung im Krankenhaus

<sup>1</sup>als Summe aus AAPV, BQKPmV, SAPV, HKPpall, HKP\_aP, stat.PV und Hospiz

**Tabelle B.4-2: Palliativversorgungskosten des letzten Lebensjahres je KV je Versichertem mit Palliativversorgung (Euro, Median, IQA)**

| KV                     | AAPV            |      | BQKPmV       |      | SAPV             |      | HKPpall      |      | HKP_aP       |      | stat.PV      |      | Hospiz       |      | PV <sup>1</sup>    |      | HKP gesamt     |      |
|------------------------|-----------------|------|--------------|------|------------------|------|--------------|------|--------------|------|--------------|------|--------------|------|--------------------|------|----------------|------|
|                        | Median (IQA)    | Rang | Median (IQA) | Rang | Median (IQA)     | Rang | Median (IQA) | Rang | Median (IQA) | Rang | Median (IQA) | Rang | Median (IQA) | Rang | Median (IQA)       | Rang | Median (IQA)   | Rang |
| Baden-Württemberg      | 50 (93)         | 8    | 0 (0)        | 1    | 0 (1.430)        | 1    | 0 (0)        | 1    | 0 (0)        | 1    | 0 (0)        | 1    | 0 (0)        | 1    | 593 (2.181)        | 6    | 0 (420)        | 1    |
| Bayern                 | 66 (104)        | 12   | 0 (0)        | 1    | 0 (27)           | 1    | 0 (0)        | 1    | 0 (0)        | 1    | 0 (0)        | 1    | 0 (0)        | 1    | 321 (2.710)        | 3    | 0 (141)        | 1    |
| Berlin                 | 36 (87)         | 3    | 0 (0)        | 1    | 180 (1.039)      | 2    | 0 (0)        | 1    | 0 (0)        | 1    | 0 (600)      | 1    | 0 (0)        | 1    | 902 (2.723)        | 10   | 0 (121)        | 1    |
| Brandenburg            | 0 (53)          | 1    | 0 (0)        | 1    | 937 (2.769)      | 5    | 0 (0)        | 1    | 0 (0)        | 1    | 0 (800)      | 1    | 0 (0)        | 1    | 1.553 (4.397)      | 16   | 0 (358)        | 1    |
| Bremen                 | 50 (85)         | 9    | 0 (0)        | 1    | 0 (388)          | 1    | 0 (0)        | 1    | 0 (0)        | 1    | 0 (0)        | 1    | 0 (0)        | 1    | 208 (1.640)        | 1    | 0 (583)        | 1    |
| Hamburg                | 49 (101)        | 5    | 0 (0)        | 1    | 0 (1.641)        | 1    | 0 (0)        | 1    | 0 (0)        | 1    | 0 (1.134)    | 1    | 0 (0)        | 1    | 1.153 (4.370)      | 13   | 0 (216)        | 1    |
| Hessen                 | 36 (76)         | 4    | 0 (0)        | 1    | 190 (2.028)      | 3    | 0 (0)        | 1    | 0 (0)        | 1    | 0 (0)        | 1    | 0 (0)        | 1    | 1.636 (3.247)      | 17   | 0 (290)        | 1    |
| Mecklenburg-Vorpommern | 50 (85)         | 6    | 0 (0)        | 1    | 0 (631)          | 1    | 0 (0)        | 1    | 0 (0)        | 1    | 0 (0)        | 1    | 0 (0)        | 1    | 479 (2.209)        | 5    | 0 (831)        | 1    |
| Niedersachsen          | 53 (89)         | 11   | 0 (0)        | 1    | 0 (885)          | 1    | 0 (0)        | 1    | 0 (0)        | 1    | 0 (0)        | 1    | 0 (0)        | 1    | 344 (2.005)        | 4    | 0 (227)        | 1    |
| Nordrhein              | 85 (363)        | 13   | 0 (0)        | 1    | 0 (776)          | 1    | 0 (0)        | 1    | 0 (0)        | 1    | 0 (0)        | 1    | 0 (0)        | 1    | 944 (3.106)        | 11   | 0 (396)        | 1    |
| Rheinland-Pfalz        | 52 (101)        | 10   | 0 (0)        | 1    | 0 (0)            | 1    | 0 (0)        | 1    | 0 (0)        | 1    | 0 (0)        | 1    | 0 (0)        | 1    | 267 (1.907)        | 2    | 0 (165)        | 1    |
| Saarland               | 49 (75)         | 5    | 0 (0)        | 1    | 0 (1.323)        | 1    | 0 (0)        | 1    | 0 (0)        | 1    | 0 (225)      | 1    | 0 (0)        | 1    | 729 (3.014)        | 7    | 0 (40)         | 1    |
| Sachsen                | 49 (77)         | 5    | 0 (0)        | 1    | 0 (1.505)        | 1    | 0 (0)        | 1    | 0 (0)        | 1    | 0 (0)        | 1    | 0 (0)        | 1    | 1.358 (1.957)      | 15   | 0 (762)        | 1    |
| Sachsen-Anhalt         | 26 (63)         | 2    | 0 (0)        | 1    | 0 (1.112)        | 1    | 0 (0)        | 1    | 0 (0)        | 1    | 0 (0)        | 1    | 0 (0)        | 1    | 955 (2.038)        | 12   | 0 (737)        | 1    |
| Schleswig-Holstein     | 50 (89)         | 7    | 0 (0)        | 1    | 0 (1.972)        | 1    | 0 (0)        | 1    | 0 (0)        | 1    | 0 (0)        | 1    | 0 (0)        | 1    | 833 (3.360)        | 8    | 0 (171)        | 1    |
| Thüringen              | 49 (78)         | 5    | 0 (0)        | 1    | 0 (1.786)        | 1    | 0 (0)        | 1    | 0 (0)        | 1    | 0 (1.134)    | 1    | 0 (0)        | 1    | 1.307 (2.470)      | 14   | 0 (370)        | 1    |
| Westfalen-Lippe        | 90 (126)        | 14   | 0 (0)        | 1    | 525 (515)        | 4    | 0 (0)        | 1    | 0 (0)        | 1    | 0 (0)        | 1    | 0 (0)        | 1    | 865 (1.286)        | 9    | 0 (742)        | 1    |
| <b>Deutschland</b>     | <b>53 (120)</b> | -    | <b>0 (0)</b> | -    | <b>0 (1.125)</b> | -    | <b>0 (0)</b> | -    | <b>0 (0)</b> | -    | <b>0 (0)</b> | -    | <b>0 (0)</b> | -    | <b>766 (2.533)</b> | -    | <b>0 (343)</b> | -    |

AAPV: Allgemeine ambulante Palliativversorgung, BQKPmV: Besonders qualifizierte und koordinierte palliativmedizinische Versorgung, HKP: Häusliche Krankenpflege (SGB V), HKP gesamt: sämtliche HKP-Leistungen des letzten Lebensjahres (nachrichtlich), HKPpall: palliative HKP-Leistungen, HKP\_aP: HKP-Leistungen ab erster ambulanter Palliativleistung, IQA: Interquartilsabstand, KV: Kassenärztliche Vereinigung, PV: Palliativversorgung, SAPV: Spezialisierte ambulante Palliativversorgung, stat.PV: stationäre Palliativversorgung im Krankenhaus

<sup>1</sup>als Summe aus AAPV, BQKPmV, SAPV, HKPpall, HKP\_aP, stat.PV und Hospiz

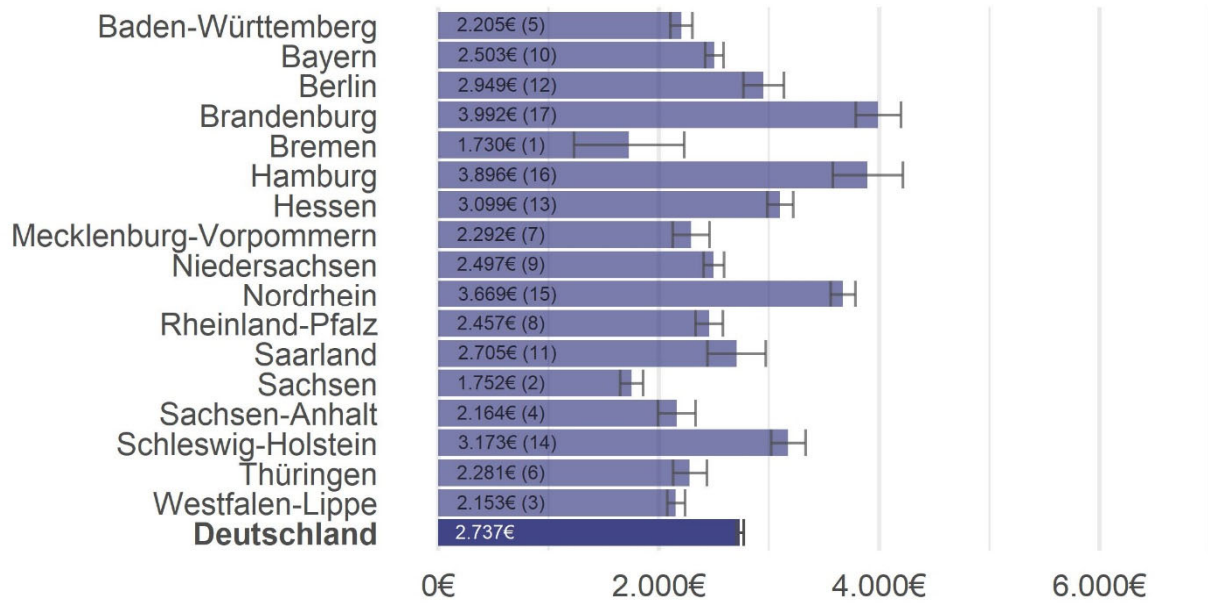

**Abbildung B.4-1: Palliativversorgungskosten des letzten Lebensjahres je KV je Versichertem mit Palliativversorgung (Mittelwert (Rang), 95% Konfidenzintervall) - ADJUSTIERT**

*KV: Kassenärztliche Vereinigung*

*Quelle: eigene Abbildung*

Palliativversorgungskosten je Versichertem mit der jeweiligen Palliativversorgungsform

|                        |       |      |        |                                                            |       |                                             |                                                                           |                                                                                    |                                                            |            |                  |         |        |    |
|------------------------|-------|------|--------|------------------------------------------------------------|-------|---------------------------------------------|---------------------------------------------------------------------------|------------------------------------------------------------------------------------|------------------------------------------------------------|------------|------------------|---------|--------|----|
| Baden-Württemberg      | 2.263 | 113  | 183    | 131                                                        | 2.243 | 968                                         | 2.483                                                                     | 1.154                                                                              | 1.000                                                      | 3.779      | 11.099           | 2.577   | 6.570  |    |
| Bayern                 | 2.141 | 139  | 187    | 147                                                        | 3.305 | 1.077                                       | 3.540                                                                     | 1.252                                                                              | 1.099                                                      | 4.093      | 11.293           | 2.663   | 6.523  |    |
| Berlin                 | 3.219 | 138  | 210    | 157                                                        | 2.044 | 1.293                                       | 2.253                                                                     | 1.517                                                                              | 2.442                                                      | 6.197      | 9.923            | 1.855   | 7.999  | 17 |
| Brandenburg            | 4.228 | 98   | 172    | 115                                                        | 4.083 | 2.925                                       | 4.324                                                                     | 3.141                                                                              | 1.448                                                      | 4.443      | 9.694            | 1.818   | 6.007  | 16 |
| Bremen                 | 2.083 | 99   | 161    | 105                                                        | 2.791 | 1.193                                       | 2.998                                                                     | 1.326                                                                              | 736                                                        | 2.480      | 10.034           | 1.327   | 6.442  | 15 |
| Hamburg                | 4.322 | 149  | 194    | 163                                                        | 4.830 | 2.687                                       | 4.894                                                                     | 2.765                                                                              | 786                                                        | 3.485      | 10.046           | 2.382   | 6.572  | 14 |
| Hessen                 | 3.265 | 99   | 219    | 124                                                        | 3.478 | 2.127                                       | 3.763                                                                     | 2.328                                                                              | 1.127                                                      | 3.621      | 10.412           | 2.049   | 6.106  | 13 |
| Mecklenburg-Vorpommern | 2.315 | 103  | 201    | 122                                                        | 2.513 | 1.251                                       | 2.847                                                                     | 1.510                                                                              | 1.018                                                      | 4.067      | 9.655            | 1.407   | 4.456  | 12 |
| Niedersachsen          | 2.348 | 111  | 204    | 125                                                        | 3.344 | 1.460                                       | 3.478                                                                     | 1.596                                                                              | 979                                                        | 3.425      | 11.245           | 1.796   | 5.263  | 11 |
| Nordrhein              | 3.780 | 467  | 194    | 463                                                        | 5.645 | 2.396                                       | 5.924                                                                     | 2.701                                                                              | 1.715                                                      | 4.089      | 11.469           | 2.599   | 5.863  | 10 |
| Rheinland-Pfalz        | 2.331 | 117  | 235    | 137                                                        | 3.919 | 1.104                                       | 4.140                                                                     | 1.259                                                                              | 971                                                        | 3.365      | 10.229           | 2.494   | 6.182  | 9  |
| Saarland               | 2.862 | 100  | 275    | 139                                                        | 3.498 | 1.821                                       | 3.655                                                                     | 1.908                                                                              | 702                                                        | 1.831      | 9.059            | 1.458   | 5.560  | 8  |
| Sachsen                | 1.816 | 102  | 209    | 126                                                        | 1.563 | 861                                         | 1.863                                                                     | 1.075                                                                              | 798                                                        | 3.318      | 10.103           | 1.529   | 5.178  | 7  |
| Sachsen-Anhalt         | 2.237 | 82   | 199    | 108                                                        | 2.203 | 1.191                                       | 2.464                                                                     | 1.413                                                                              | 1.005                                                      | 3.285      | 9.685            | 1.398   | 5.444  | 6  |
| Schleswig-Holstein     | 3.192 | 115  | 162    | 122                                                        | 4.542 | 2.223                                       | 4.661                                                                     | 2.356                                                                              | 953                                                        | 3.557      | 9.056            | 2.166   | 6.234  | 5  |
| Thüringen              | 2.137 | 97   | 225    | 112                                                        | 1.795 | 1.018                                       | 2.191                                                                     | 1.275                                                                              | 1.264                                                      | 4.077      | 9.808            | 1.725   | 4.463  | 4  |
| Westfalen-Lippe        | 2.253 | 186  | 249    | 188                                                        | 739   | 794                                         | 1.136                                                                     | 1.165                                                                              | 1.425                                                      | 3.735      | 11.092           | 2.181   | 5.814  | 3  |
| Deutschland            | 2.737 | 178  | 203    | 188                                                        | 2.935 | 1.521                                       | 3.202                                                                     | 1.739                                                                              | 1.228                                                      | 3.844      | 10.712           | 2.197   | 6.031  | 2  |
|                        | PV    | AAPV | BQKpmV | Summe von AAPV und BQKpmV bei AAPV- oder BQKpmV-Versorgten | SAPV  | Ambulante PV bei AAPV- oder SAPV-Versorgten | Summe von SAPV, HKPpall und HKP_ap bei AAPV-/BQKpmV- oder SAPV-Versorgten | Summe von Ambulanter PV, HKPpall und HKP_ap bei AAPV-/BQKpmV- oder SAPV-Versorgten | Summe von HKPpall und HKP_ap bei HKPpall/HKP_ap-Versorgten | HKP gesamt | Pflegeleistungen | stat.PV | Hospiz | 1  |

**Abbildung B.4-2: Mittelwerte ausgewählter Bestandteile der Palliativversorgungskosten im letzten Lebensjahr je KV je Versichertem mit der jeweiligen Versorgungsform (Euro)**

AAPV: Allgemeine ambulante Palliativversorgung, BQKpmV: Besonders qualifizierte und koordinierte palliativmedizinische Versorgung, HKP: Häusliche Krankenpflege (SGB V), HKP gesamt: sämtliche HKP-Leistungen des letzten Lebensjahres (nachrichtlich), HKPpall: palliative HKP-Leistungen, HKP\_ap: HKP-Leistungen ab erster ambulanter Palliativleistung, KV: Kassenärztliche Vereinigung, PV: Palliativversorgung, SAPV: Spezialisierte ambulante Palliativversorgung, stat.PV: stationäre Palliativversorgung im Krankenhaus  
Quelle: eigene Abbildung



Onlinematerial zum Beitrag „Ergebnisqualität und Kosten der allgemeinen und spezialisierten Palliativversorgung in Deutschland im regionalen Vergleich: eine GKV-Routinedatenstudie“

| KV                     | PV    | AAPV | BQKpMv | Summe von AAPV und BQKpMv bei AAPV- oder BQKpMv-Versorgten | SAPV  | Ambulante PV bei AAPV-/BQKpMv- oder SAPV-Versorgten | Summe von SAPV, HKP pall und HKP ap bei SAPV-Versorgten | Summe von Ambulanter PV, HKP pall und HKP ap bei AAPV-/BQKpMv- oder SAPV-Versorgten | Summe von HKP pall und HKP ap bei HKP pall/HKP ap-Versorgten | HKP gesamt | Pflegeleistungen | stat.PV | Hospiz | Rang |
|------------------------|-------|------|--------|------------------------------------------------------------|-------|-----------------------------------------------------|---------------------------------------------------------|-------------------------------------------------------------------------------------|--------------------------------------------------------------|------------|------------------|---------|--------|------|
| Baden-Württemberg      | 2.205 | 116  | 176    | 133                                                        | 2.283 | 969                                                 | 2.538                                                   | 1.174                                                                               | 1.048                                                        | 3.775      | 10.923           | 2.435   | 6.292  | 17   |
| Bayern                 | 2.503 | 145  | 185    | 154                                                        | 3.387 | 1.231                                               | 3.633                                                   | 1.450                                                                               | 1.184                                                        | 4.065      | 10.276           | 2.787   | 6.239  | 16   |
| Berlin                 | 2.949 | 137  | 209    | 156                                                        | 1.954 | 1.186                                               | 2.178                                                   | 1.408                                                                               | 2.334                                                        | 6.145      | 10.541           | 1.718   | 8.140  | 15   |
| Brandenburg            | 3.992 | 91   | 179    | 108                                                        | 3.955 | 2.737                                               | 4.183                                                   | 2.933                                                                               | 1.578                                                        | 4.861      | 10.916           | 1.932   | 6.359  | 14   |
| Bremen                 | 1.730 | 97   | 161    | 102                                                        | 2.594 | 1.069                                               | 2.791                                                   | 1.180                                                                               | 757                                                          | 2.291      | 11.061           | 1.114   | 5.639  | 13   |
| Hamburg                | 3.896 | 148  | 179    | 161                                                        | 4.732 | 2.469                                               | 4.816                                                   | 2.564                                                                               | 952                                                          | 3.587      | 10.660           | 2.274   | 6.049  | 12   |
| Hessen                 | 3.099 | 99   | 215    | 124                                                        | 3.543 | 2.055                                               | 3.833                                                   | 2.254                                                                               | 1.102                                                        | 3.398      | 10.794           | 1.943   | 5.811  | 11   |
| Mecklenburg-Vorpommern | 2.292 | 96   | 211    | 115                                                        | 2.288 | 1.190                                               | 2.580                                                   | 1.415                                                                               | 1.120                                                        | 4.472      | 10.512           | 1.552   | 4.831  | 10   |
| Niedersachsen          | 2.497 | 110  | 205    | 124                                                        | 3.214 | 1.515                                               | 3.331                                                   | 1.656                                                                               | 1.057                                                        | 3.578      | 10.722           | 1.817   | 5.249  | 9    |
| Nordrhein              | 3.669 | 466  | 192    | 462                                                        | 5.630 | 2.383                                               | 5.902                                                   | 2.674                                                                               | 1.596                                                        | 3.852      | 11.349           | 2.483   | 5.812  | 8    |
| Rheinland-Pfalz        | 2.457 | 117  | 239    | 138                                                        | 3.861 | 1.169                                               | 4.054                                                   | 1.306                                                                               | 953                                                          | 3.208      | 10.305           | 2.560   | 6.302  | 7    |
| Saarland               | 2.705 | 100  | 276    | 138                                                        | 3.445 | 1.758                                               | 3.576                                                   | 1.806                                                                               | 682                                                          | 1.496      | 10.020           | 1.450   | 5.741  | 6    |
| Sachsen                | 1.752 | 99   | 209    | 123                                                        | 1.467 | 804                                                 | 1.767                                                   | 1.013                                                                               | 893                                                          | 3.778      | 10.783           | 1.572   | 5.351  | 5    |
| Sachsen-Anhalt         | 2.164 | 75   | 215    | 102                                                        | 2.040 | 1.119                                               | 2.268                                                   | 1.303                                                                               | 989                                                          | 3.668      | 10.597           | 1.548   | 6.078  | 4    |
| Schleswig-Holstein     | 3.173 | 112  | 169    | 120                                                        | 4.352 | 2.188                                               | 4.443                                                   | 2.311                                                                               | 1.007                                                        | 3.594      | 9.398            | 2.250   | 6.196  | 3    |
| Thüringen              | 2.281 | 94   | 231    | 109                                                        | 1.760 | 1.037                                               | 2.137                                                   | 1.279                                                                               | 1.255                                                        | 4.278      | 10.414           | 1.875   | 4.932  | 2    |
| Westfalen-Lippe        | 2.153 | 183  | 247    | 185                                                        | 920   | 770                                                 | 1.337                                                   | 1.122                                                                               | 1.330                                                        | 3.575      | 11.155           | 2.119   | 5.959  | 1    |
| Deutschland            | 2.737 | 178  | 203    | 188                                                        | 2.935 | 1.521                                               | 3.202                                                   | 1.739                                                                               | 1.228                                                        | 3.844      | 10.712           | 2.197   | 6.031  |      |

**Abbildung B.4-3: Mittelwerte ausgewählter Bestandteile der Palliativversorgungskosten im letzten Lebensjahr je KV je Versichertem mit der jeweiligen Versorgungsform (Euro) - ADJUSTIERT**

AAPV: Allgemeine ambulante Palliativversorgung, BQKpMv: Besonders qualifizierte und koordinierte palliativmedizinische Versorgung, HKP: Häusliche Krankenpflege (SGB V), HKP gesamt: sämtliche HKP-Leistungen des letzten Lebensjahres (nachrichtlich), HKP pall: palliative HKP-Leistungen, HKP ap: HKP-Leistungen ab erster ambulanter Palliativleistung, KV: Kassenärztliche Vereinigung, PV: Palliativversorgung, SAPV: Spezialisierte ambulante Palliativversorgung, stat.PV: stationäre Palliativversorgung im Krankenhaus  
Quelle: eigene Abbildung

Onlinematerial zum Beitrag „Ergebnisqualität und Kosten der allgemeinen und spezialisierten Palliativversorgung in Deutschland im regionalen Vergleich: eine GKV-Routinedatenstudie“

|                        |       |      |        |                                                            |       |                                             |                                                        |                                                                                    |                                                            |            |                  |         |        |      |
|------------------------|-------|------|--------|------------------------------------------------------------|-------|---------------------------------------------|--------------------------------------------------------|------------------------------------------------------------------------------------|------------------------------------------------------------|------------|------------------|---------|--------|------|
| Baden-Württemberg      | 593   | 68   | 197    | 75                                                         | 1.645 | 167                                         | 1.691                                                  | 232                                                                                | 254                                                        | 929        | 9.171            | 1.531   | 1.931  | Rang |
| Bayern                 | 321   | 82   | 100    | 87                                                         | 3.300 | 140                                         | 3.378                                                  | 163                                                                                | 258                                                        | 930        | 9.422            | 1.530   | 1.805  |      |
| Berlin                 | 902   | 74   | 226    | 83                                                         | 982   | 416                                         | 1.032                                                  | 468                                                                                | 327                                                        | 1.122      | 7.250            | 1.530   | 2.325  |      |
| Brandenburg            | 1.553 | 57   | 191    | 64                                                         | 1.956 | 1.105                                       | 2.078                                                  | 1.147                                                                              | 270                                                        | 862        | 7.058            | 1.507   | 1.355  |      |
| Bremen                 | 208   | 63   | 106    | 66                                                         | 944   | 111                                         | 1.045                                                  | 156                                                                                | 245                                                        | 910        | 8.575            | 1.287   | 1.384  |      |
| Hamburg                | 1.153 | 71   | 226    | 76                                                         | 1.872 | 353                                         | 2.002                                                  | 458                                                                                | 353                                                        | 1.299      | 7.042            | 1.531   | 1.817  |      |
| Hessen                 | 1.636 | 63   | 226    | 69                                                         | 1.866 | 868                                         | 1.921                                                  | 1.110                                                                              | 247                                                        | 888        | 8.521            | 1.531   | 1.661  |      |
| Mecklenburg-Vorpommern | 479   | 64   | 184    | 69                                                         | 1.070 | 136                                         | 1.142                                                  | 200                                                                                | 249                                                        | 860        | 7.452            | 1.307   | 1.264  |      |
| Niedersachsen          | 344   | 69   | 223    | 75                                                         | 1.538 | 165                                         | 1.607                                                  | 214                                                                                | 207                                                        | 854        | 9.384            | 1.507   | 1.453  |      |
| Nordrhein              | 944   | 205  | 223    | 213                                                        | 2.325 | 494                                         | 2.435                                                  | 594                                                                                | 429                                                        | 1.257      | 9.550            | 1.453   | 1.470  |      |
| Rheinland-Pfalz        | 267   | 68   | 236    | 76                                                         | 1.981 | 106                                         | 2.056                                                  | 130                                                                                | 203                                                        | 656        | 8.105            | 1.508   | 2.080  |      |
| Saarland               | 729   | 64   | 247    | 71                                                         | 1.736 | 282                                         | 1.746                                                  | 304                                                                                | 110                                                        | 433        | 6.786            | 1.358   | 1.421  |      |
| Sachsen                | 1.358 | 63   | 223    | 66                                                         | 1.556 | 279                                         | 1.635                                                  | 439                                                                                | 208                                                        | 772        | 7.636            | 1.508   | 1.318  |      |
| Sachsen-Anhalt         | 955   | 61   | 224    | 65                                                         | 1.246 | 261                                         | 1.332                                                  | 397                                                                                | 267                                                        | 820        | 6.982            | 1.307   | 1.503  |      |
| Schleswig-Holstein     | 833   | 68   | 96     | 70                                                         | 2.576 | 261                                         | 2.653                                                  | 346                                                                                | 235                                                        | 909        | 6.389            | 1.507   | 1.781  |      |
| Thüringen              | 1.307 | 65   | 240    | 69                                                         | 1.849 | 346                                         | 1.887                                                  | 572                                                                                | 187                                                        | 673        | 7.902            | 1.507   | 1.264  |      |
| Westfalen-Lippe        | 865   | 115  | 226    | 119                                                        | 600   | 705                                         | 645                                                    | 750                                                                                | 437                                                        | 1.095      | 9.140            | 1.508   | 1.750  |      |
| Deutschland            | 766   | 81   | 223    | 87                                                         | 1.528 | 337                                         | 1.636                                                  | 440                                                                                | 285                                                        | 944        | 8.573            | 1.508   | 1.609  |      |
|                        | PV    | AAPV | BQKpmV | Summe von AAPV und BQKpmV bei AAPV- oder BQKpmV-Versorgten | SAPV  | Ambulante PV bei AAPV- oder SAPV-Versorgten | Summe von SAPV, HKPpall und HKP ap bei SAPV-Versorgten | Summe von Ambulanter PV, HKPpall und HKP ap bei AAPV-/BQKpmV- oder SAPV-Versorgten | Summe von HKPpall und HKP ap bei HKPpall/HKP ap-Versorgten | HKP gesamt | Pflegeleistungen | stat.PV | Hospiz |      |

**Abbildung B.4-4: Mediane ausgewählter Bestandteile der Palliativversorgungskosten im letzten Lebensjahr je KV je Versichertem mit der jeweiligen Versorgungsform (Euro)**

AAPV: Allgemeine ambulante Palliativversorgung, BQKpmV: Besonders qualifizierte und koordinierte palliativmedizinische Versorgung, HKP: Häusliche Krankenpflege (SGB V), HKP gesamt: sämtliche HKP-Leistungen des letzten Lebensjahres (nachrichtlich), HKPpall: palliative HKP-Leistungen, HKP ap: HKP-Leistungen ab erster ambulanter Palliativleistung, KV: Kassenärztliche Vereinigung, PV: Palliativversorgung, SAPV: Spezialisierte ambulante Palliativversorgung, stat.PV: stationäre Palliativversorgung im Krankenhaus  
Quelle: eigene Abbildung

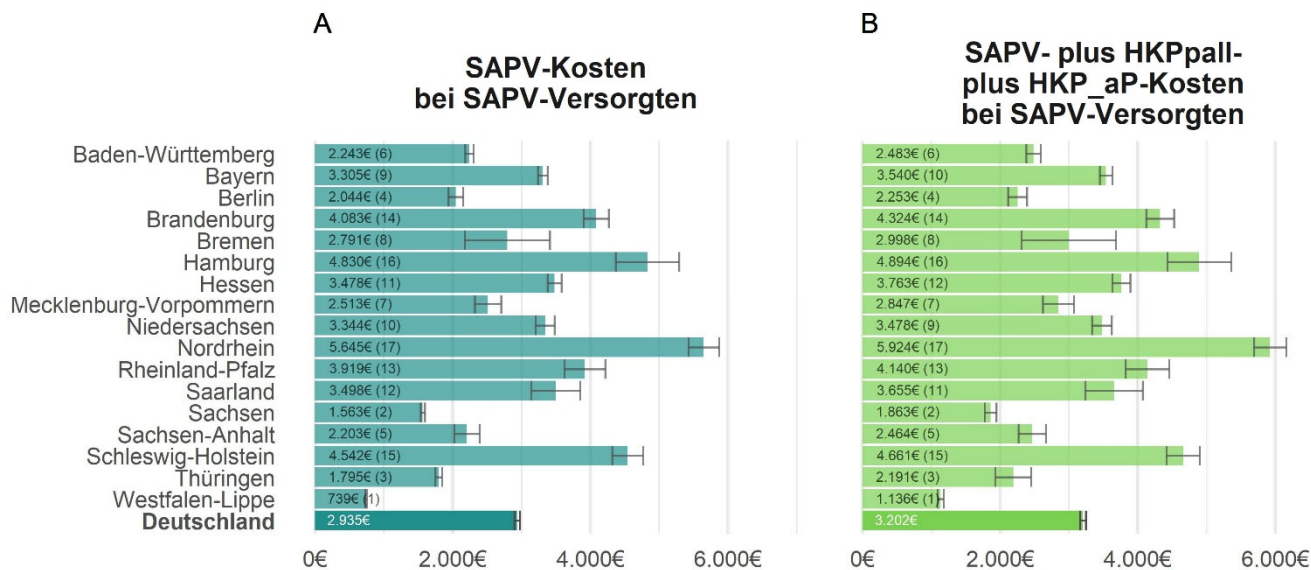

**Abbildung B.4-5: A) SAPV-Kosten je Versichertem mit SAPV, B) SAPV-Kosten plus palliative HKP-Kosten<sup>1</sup> je Versichertem mit SAPV (je KV, Mittelwert (Rang), 95%-Konfidenzintervall)**

HKP: Häusliche Krankenpflege (SGB V), HKP<sub>pall</sub>: palliative HKP-Leistungen, HKP<sub>aP</sub>: HKP-Leistungen ab erster ambulanter Palliativleistung, KV: Kassenärztliche Vereinigung, SAPV: Spezialisierte ambulante Palliativversorgung

<sup>1</sup>palliative HKP-Kosten = HKP<sub>pall</sub> + HKP<sub>aP</sub>

Quelle: eigene Abbildung

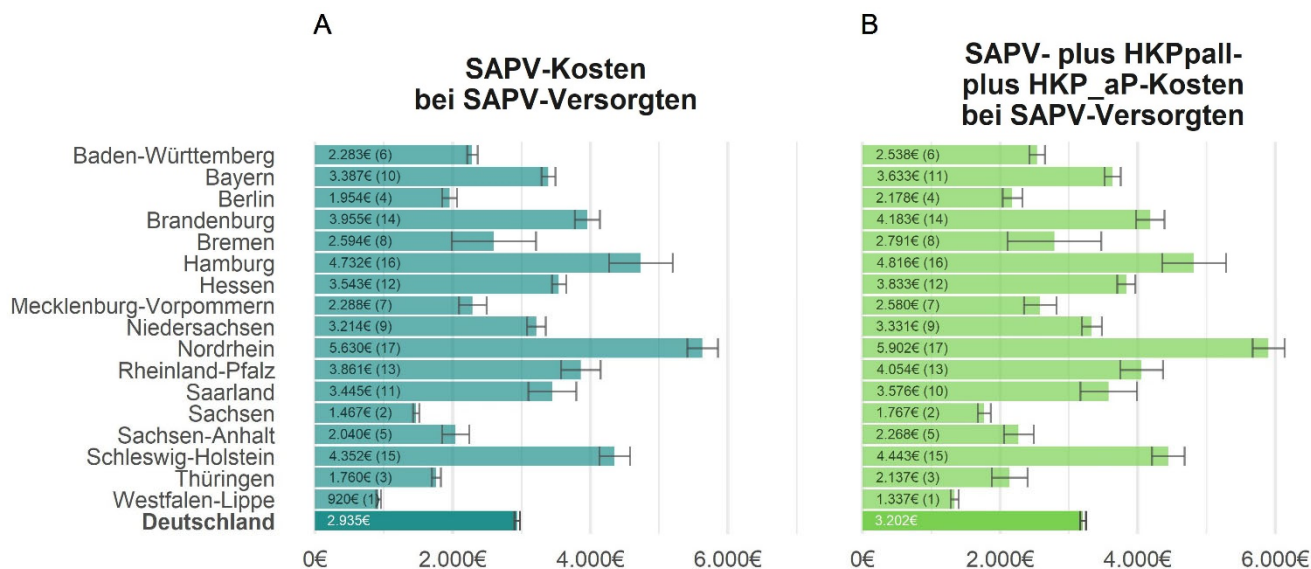

**Abbildung B.4-6: A) SAPV-Kosten je Versichertem mit SAPV, B) SAPV-Kosten plus palliative HKP-Kosten<sup>1</sup> je Versichertem mit SAPV (je KV, Mittelwert (Rang), 95%-Konfidenzintervall) - ADJUSTIERT**

HKP: Häusliche Krankenpflege (SGB V), HKP<sub>pall</sub>: palliative HKP-Leistungen, HKP<sub>aP</sub>: HKP-Leistungen ab erster ambulanter Palliativleistung, KV: Kassenärztliche Vereinigung, SAPV: Spezialisierte ambulante Palliativversorgung

<sup>1</sup>palliative HKP-Kosten = HKP<sub>pall</sub> + HKP<sub>aP</sub>

Quelle: eigene Abbildung

## B.5 Kosten-Effektivitäts-Relationen (KER)

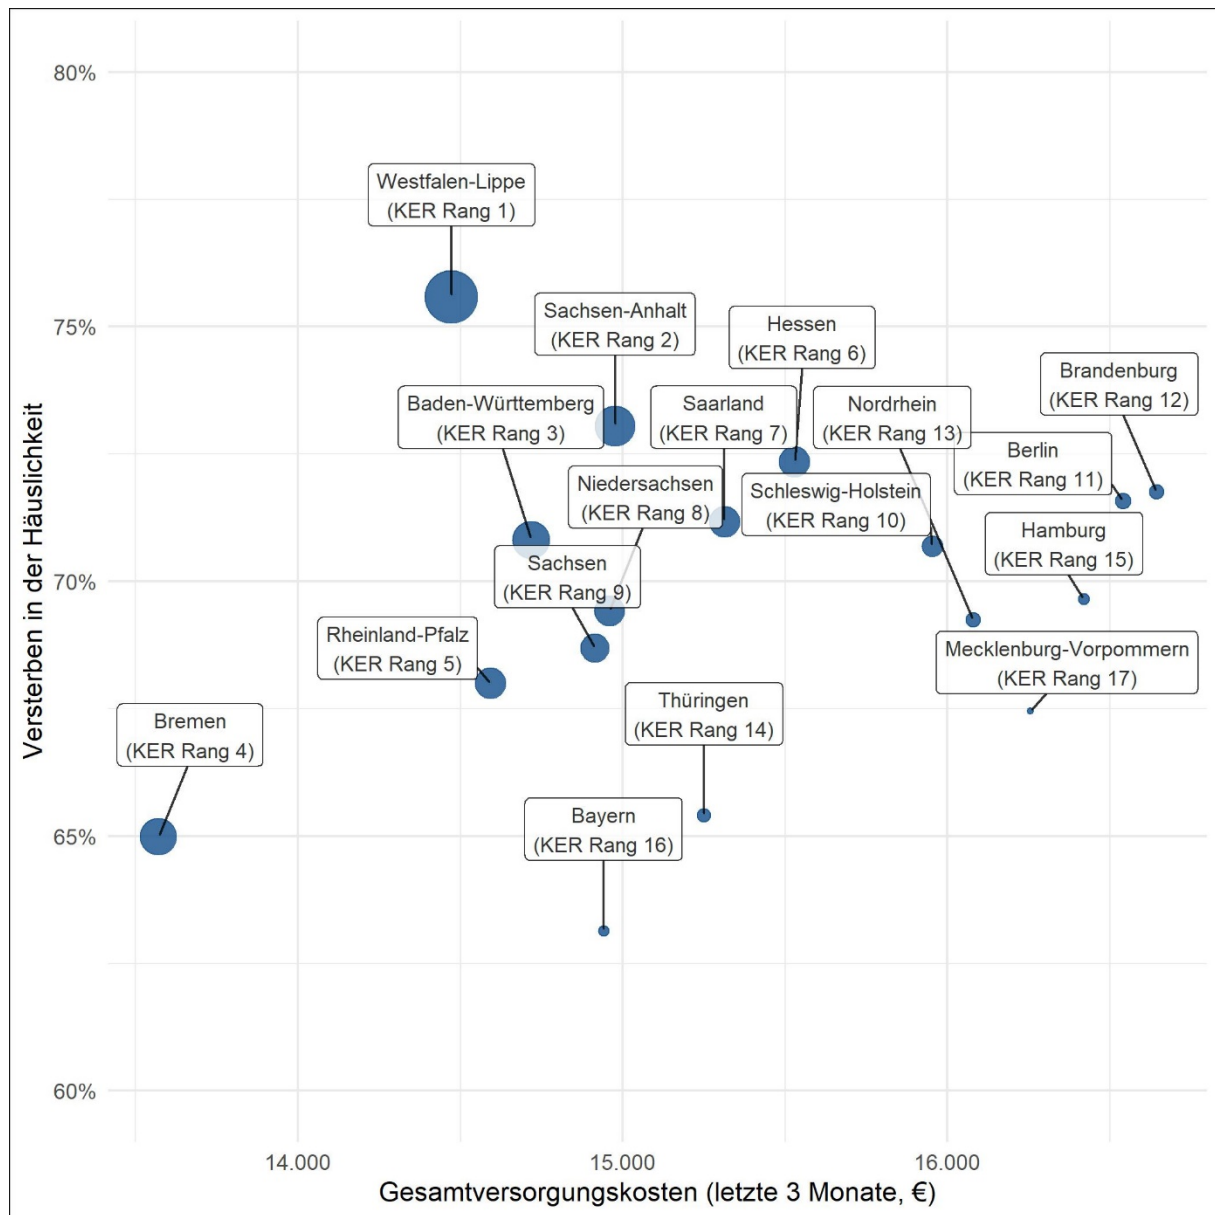

**Abbildung B.5-1: Kosten-Effektivitäts-Relation (KER) je KV-Region - ADJUSTIERT**

KER als Gesamtversorgungskosten der letzten 3 Lebensmonate je Versichertem zur Rate des Versterbens in der Häuslichkeit für Versicherte mit Palliativversorgung; größere Kreisfläche bedeutet günstigere KER

KV: Kassenärztliche Vereinigung

Quelle: eigene Abbildung

**Tabelle B.5-1: Kosten-Effektivitäts-Relation (KER) je KV-Region**

| KV                     | Gesamtkosten (letzte 3 Lebensmonate, €) |          | Versterben in der Häuslichkeit |          | KER (€ je 1% Versterben in der Häuslichkeit) |          | KER (€ je 100% Versterben in der Häuslichkeit) |          |
|------------------------|-----------------------------------------|----------|--------------------------------|----------|----------------------------------------------|----------|------------------------------------------------|----------|
|                        | Wert                                    | Rang     | Wert                           | Rang     | Wert                                         | Rang     | Wert                                           | Rang     |
| Baden-Württemberg      | 14.451                                  | 4        | 71,8%                          | 4        | 201                                          | 3        | 20.123                                         | 3        |
| Bayern                 | 14.444                                  | 3        | 62,4%                          | 17       | 231                                          | 12       | 23.133                                         | 12       |
| Berlin                 | 17.605                                  | 16       | 68,5%                          | 10       | 257                                          | 17       | 25.686                                         | 17       |
| Brandenburg            | 17.951                                  | 17       | 70,2%                          | 7        | 256                                          | 16       | 25.564                                         | 16       |
| Bremen                 | 13.346                                  | 1        | 66,2%                          | 15       | 202                                          | 4        | 20.173                                         | 4        |
| Hamburg                | 17.247                                  | 15       | 68,0%                          | 12       | 254                                          | 15       | 25.370                                         | 15       |
| Hessen                 | 15.487                                  | 8        | 73,5%                          | 2        | 211                                          | 5        | 21.074                                         | 5        |
| Mecklenburg-Vorpommern | 16.832                                  | 14       | 68,0%                          | 11       | 247                                          | 13       | 24.746                                         | 13       |
| Niedersachsen          | 14.358                                  | 2        | 71,4%                          | 5        | 201                                          | 2        | 20.100                                         | 2        |
| Nordrhein              | 15.928                                  | 13       | 70,2%                          | 8        | 227                                          | 11       | 22.702                                         | 11       |
| Rheinland-Pfalz        | 14.656                                  | 6        | 67,1%                          | 14       | 218                                          | 7        | 21.838                                         | 7        |
| Saarland               | 15.807                                  | 10       | 69,8%                          | 9        | 226                                          | 10       | 22.639                                         | 10       |
| Sachsen                | 15.254                                  | 7        | 67,7%                          | 13       | 225                                          | 8        | 22.539                                         | 8        |
| Sachsen-Anhalt         | 15.595                                  | 9        | 73,2%                          | 3        | 213                                          | 6        | 21.314                                         | 6        |
| Schleswig-Holstein     | 15.897                                  | 12       | 70,4%                          | 6        | 226                                          | 9        | 22.571                                         | 9        |
| Thüringen              | 15.817                                  | 11       | 63,8%                          | 16       | 248                                          | 14       | 24.805                                         | 14       |
| Westfalen-Lippe        | 14.599                                  | 5        | 75,7%                          | 1        | 193                                          | 1        | 19.280                                         | 1        |
| <b>Deutschland</b>     | <b>15.317</b>                           | <b>-</b> | <b>69,5%</b>                   | <b>-</b> | <b>220</b>                                   | <b>-</b> | <b>22.037</b>                                  | <b>-</b> |

*KER als Gesamtversorgungskosten der letzten 3 Lebensmonate je Versichertem zur Rate des Versterbens in der Häuslichkeit für Versicherte mit Palliativversorgung*

*KV: Kassenärztliche Vereinigung*

**Tabelle B.5-2: Kosten-Effektivitäts-Relation (KER) je KV-Region - ADJUSTIERT**

| KV                     | Gesamtversorgungskosten (letzte 3 Monate, €) |      | Versterben in der Häuslichkeit |      | KER (€ je 1% Versterben in der Häuslichkeit) |      | KER (€ je 100% Versterben in der Häuslichkeit) |      |
|------------------------|----------------------------------------------|------|--------------------------------|------|----------------------------------------------|------|------------------------------------------------|------|
|                        | Wert                                         | Rang | Wert                           | Rang | Wert                                         | Rang | Wert                                           | Rang |
| Baden-Württemberg      | 14.717                                       | 4    | 70,8%                          | 7    | 208                                          | 3    | 20.781                                         | 3    |
| Bayern                 | 14.941                                       | 6    | 63,1%                          | 17   | 237                                          | 16   | 23.665                                         | 16   |
| Berlin                 | 16.540                                       | 16   | 71,6%                          | 5    | 231                                          | 11   | 23.110                                         | 11   |
| Brandenburg            | 16.644                                       | 17   | 71,8%                          | 4    | 232                                          | 12   | 23.195                                         | 12   |
| Bremen                 | 13.570                                       | 1    | 65,0%                          | 16   | 209                                          | 4    | 20.882                                         | 4    |
| Hamburg                | 16.420                                       | 15   | 69,6%                          | 9    | 236                                          | 15   | 23.575                                         | 15   |
| Hessen                 | 15.529                                       | 11   | 72,3%                          | 3    | 215                                          | 6    | 21.467                                         | 6    |
| Mecklenburg-Vorpommern | 16.255                                       | 14   | 67,5%                          | 14   | 241                                          | 17   | 24.098                                         | 17   |
| Niedersachsen          | 14.959                                       | 7    | 69,4%                          | 10   | 215                                          | 8    | 21.548                                         | 8    |
| Nordrhein              | 16.079                                       | 13   | 69,2%                          | 11   | 232                                          | 13   | 23.223                                         | 13   |
| Rheinland-Pfalz        | 14.594                                       | 3    | 68,0%                          | 13   | 215                                          | 5    | 21.464                                         | 5    |
| Saarland               | 15.313                                       | 10   | 71,2%                          | 6    | 215                                          | 7    | 21.518                                         | 7    |
| Sachsen                | 14.914                                       | 5    | 68,7%                          | 12   | 217                                          | 9    | 21.714                                         | 9    |
| Sachsen-Anhalt         | 14.976                                       | 8    | 73,0%                          | 2    | 205                                          | 2    | 20.501                                         | 2    |
| Schleswig-Holstein     | 15.953                                       | 12   | 70,7%                          | 8    | 226                                          | 10   | 22.568                                         | 10   |

Onlinematerial zum Beitrag „Ergebnisqualität und Kosten der allgemeinen und spezialisierten Palliativversorgung in Deutschland im regionalen Vergleich: eine GKV-Routinedatenstudie“

| KV                 | Gesamtversorgungskosten (letzte 3 Monate, €) |      | Versterben in der Häuslichkeit |      | KER (€ je 1% Versterben in der Häuslichkeit) |      | KER (€ je 100% Versterben in der Häuslichkeit) |      |
|--------------------|----------------------------------------------|------|--------------------------------|------|----------------------------------------------|------|------------------------------------------------|------|
|                    | Wert                                         | Rang | Wert                           | Rang | Wert                                         | Rang | Wert                                           | Rang |
| Thüringen          | 15.250                                       | 9    | 65,4%                          | 15   | 233                                          | 14   | 23.319                                         | 14   |
| Westfalen-Lippe    | 14.473                                       | 2    | 75,6%                          | 1    | 191                                          | 1    | 19.148                                         | 1    |
| <b>Deutschland</b> | <b>15.317</b>                                | -    | <b>69,5%</b>                   | -    | <b>220</b>                                   | -    | <b>22.037</b>                                  | -    |

*KER als Gesamtversorgungskosten der letzten 3 Lebensmonate je Versichertem zur Rate des Versterbens in der Häuslichkeit für Versicherte mit Palliativversorgung*

*KV: Kassenärztliche Vereinigung*

## B.6 Zusammenschau der Variabilität aller Zielindikatoren

**Tabelle B.6-1: Variabilität der qualitäts- und kostenbezogenen Outcomeindikatoren zwischen den KV-Regionen**

|            | Zielgröße                                                  |            | Rang 1          | Rang 2          | Rang 16                | Rang 17                | Wert Rang 17 / Wert Rang 1 |
|------------|------------------------------------------------------------|------------|-----------------|-----------------|------------------------|------------------------|----------------------------|
| Outcomes   | Sterbeort KH                                               | rohe Werte | Westfalen-Lippe | Hessen          | Thüringen              | Bayern                 | 1,55                       |
|            |                                                            | Adjustiert | Westfalen-Lippe | Sachsen-Anhalt  | Bremen                 | Bayern                 | 1,51                       |
|            | Sterbeort KH, nicht Palliativstation                       | rohe Werte | Saarland        | Hessen          | Berlin                 | Mecklenburg-Vorpommern | 1,68                       |
|            |                                                            | Adjustiert | Saarland        | Sachsen         | Niedersachsen          | Bremen                 | 1,75                       |
|            | KH-Fall                                                    | rohe Werte | Westfalen-Lippe | Berlin          | Bremen                 | Bayern                 | 1,20                       |
|            |                                                            | Adjustiert | Berlin          | Westfalen-Lippe | Bayern                 | Bremen                 | 1,27                       |
|            | KH-Fall, ohne PV                                           | rohe Werte | Sachsen         | Westfalen-Lippe | Bayern                 | Bremen                 | 1,29                       |
|            |                                                            | Adjustiert | Thüringen       | Sachsen         | Bayern                 | Bremen                 | 1,46                       |
|            | Rettungsdiensteinsatz                                      | rohe Werte | Westfalen-Lippe | Bayern          | Bremen                 | Thüringen              | 1,75                       |
|            |                                                            | Adjustiert | Bayern          | Westfalen-Lippe | Thüringen              | Bremen                 | 1,87                       |
|            | Chemotherapie                                              | rohe Werte | Saarland        | Sachsen-Anhalt  | Schleswig-Holstein     | Hamburg                | 1,65                       |
|            |                                                            | Adjustiert | Saarland        | Sachsen-Anhalt  | Mecklenburg-Vorpommern | Hamburg                | 1,61                       |
|            | ITS-Aufenthalt                                             | rohe Werte | Rheinland-Pfalz | Westfalen-Lippe | Bayern                 | Berlin                 | 1,81                       |
|            |                                                            | Adjustiert | Rheinland-Pfalz | Westfalen-Lippe | Berlin                 | Mecklenburg-Vorpommern | 1,97                       |
|            | Parenterale Ernährung                                      | rohe Werte | Bayern          | Rheinland-Pfalz | Berlin                 | Brandenburg            | 4,63                       |
|            |                                                            | Adjustiert | Bayern          | Rheinland-Pfalz | Berlin                 | Brandenburg            | 2,46                       |
|            | Magensonde (PEG)                                           | rohe Werte | Sachsen         | Rheinland-Pfalz | Schleswig-Holstein     | Bremen                 | 2,86                       |
|            |                                                            | Adjustiert | Rheinland-Pfalz | Sachsen         | Schleswig-Holstein     | Bremen                 | 2,85                       |
|            | Aggregierter Outcome                                       | rohe Werte | Westfalen-Lippe | Saarland        | Mecklenburg-Vorpommern | Bremen                 | -0,96                      |
|            |                                                            | Adjustiert | Westfalen-Lippe | Saarland        | Mecklenburg-Vorpommern | Bremen                 | -1,36                      |
| Kosten     | Gesamtversorgungskosten                                    | rohe Werte | Bremen          | Niedersachsen   | Berlin                 | Brandenburg            | 1,35                       |
|            |                                                            | Adjustiert | Bremen          | Westfalen-Lippe | Berlin                 | Brandenburg            | 1,23                       |
|            | PV-Kosten des letzten Lebensjahrs                          | rohe Werte | Sachsen         | Bremen          | Brandenburg            | Hamburg                | 2,38                       |
|            |                                                            | Adjustiert | Bremen          | Sachsen         | Hamburg                | Brandenburg            | 2,31                       |
|            | SAPV-Kosten bei SAPV-Versorgten                            | rohe Werte | Westfalen-Lippe | Sachsen         | Hamburg                | Nordrhein              | 7,64                       |
|            |                                                            | Adjustiert | Westfalen-Lippe | Sachsen         | Hamburg                | Nordrhein              | 6,12                       |
|            | SAPV- plus HKPpall- plus HKP_aP-Kosten bei SAPV-Versorgten | rohe Werte | Westfalen-Lippe | Sachsen         | Hamburg                | Nordrhein              | 5,22                       |
|            |                                                            | Adjustiert | Westfalen-Lippe | Sachsen         | Hamburg                | Nordrhein              | 4,42                       |
| KER        | KER (basierend auf Gesamtkosten)                           | rohe Werte | Westfalen-Lippe | Niedersachsen   | Brandenburg            | Berlin                 | 1,33                       |
|            |                                                            | adjustiert | Westfalen-Lippe | Sachsen-Anhalt  | Bayern                 | Mecklenburg-Vorpommern | 1,26                       |
| Zugespielt | Anteil Nichtversorgter an allen Verstorbenen               | rohe Werte | Bayern          | Niedersachsen   | Bremen                 | Sachsen-Anhalt         | 1,30                       |

HKPpall: palliative HKP-Leistungen, HKP\_aP: HKP-Leistungen ab erster ambulanter Palliativleistung, ITS: Intensivstation, KER: Kosten-Effektivitäts-Relation, KH: Krankenhaus, KV: Kassenärztliche Vereinigung, PEG: Perkutan-endoskopische Gastrostomie, PV: Palliativversorgung, SAPV: Spezialisierte ambulante Palliativversorgung

## C. eDiskussion: Ergänzungen zur Diskussion

### C.1 Externe Validität der Outcomes

Die von uns herangezogenen Outcomeindikatoren zur Abbildung der Qualität von PV wurden ähnlich auch in anderen Studien gemessen [5–9]. Die Vergleichbarkeit ist dennoch eingeschränkt, insbesondere, weil andere Einschlusskriterien für die Studienpopulation (Grundgesamtheit) galten. So untersuchte der Bertelsmann Faktencheck [5] für die Jahre 2010-2014 bspw. die Anteile an allen Verstorbenen mit Krebserkrankung, die im letzten Lebensmonat noch eine Chemotherapie erhielten. Diese betragen dort 7,6% in Bremen und 11,1% in Baden-Württemberg. In Niedersachsen lautete diese Rate 2016/17 auf 10,4% [6]. In unserer Studie schwankt sie zwischen 9,8% im Saarland und 16,1% in Hamburg, allerdings bezogen auf krebserkrankte Verstorbene mit PV im letzten Lebensjahr. Eine Studie zur SAPV in Nordrhein auf der Basis von durch SAPV-Teams dokumentierten Routinedaten [7] ermittelte eine Rate von 85,9% an Versicherten, die im häuslichen Umfeld verstarben. In unserer Studie waren dies in Nordrhein 70,2%, allerdings bei VS, die im letzten Lebensjahr irgendeine Form von Palliativversorgung erhielten. Für die Population der >65-Jährigen variierte der Anteil der in den Jahren 2011-2013 im Krankenhaus Verstorbenen zwischen 41,1% in Baden-Württemberg und 48,8% in Berlin [8]. Im Vergleich liegen in unserer Studienpopulation der VS mit PV Baden-Württemberg unterhalb des bundesdeutschen Mittels und Berlin darüber, die Schwankungsbreite ist aber deutlich größer (vgl. Ergebnisse, Abb. 1). In der Studie von Krause et al. [9] lagen die bundesdurchschnittlichen Raten (2016) für VS, die AAPV oder SAPV erhalten hatten, für ein Versterben im Krankenhaus bei 30,9%, für mindestens einen Krankenhausaufenthalt (ohne solche mit palliativer Versorgung) im letzten Lebensmonat bei 36,5%, Chemotherapie bei Krebserkrankung bei 11,3%, ITS-Aufenthalt bei 4,4%, parenterale Ernährung bei 1,5% und einem Magensondeneinsatz bei 0,6% ggü. entsprechenden vergleichbaren Raten in unserer Studie mit 30,5%, 32,7%, 12,2%, 5,0%, 1,4%, 0,7% bei VS mit PV.

### C.2 Externe Validität der Kosten

Direkt vergleichbare Referenzzahlen zu den Gesamtversorgungskosten in den letzten drei Lebensmonaten sind uns nicht bekannt. Sehr wohl einordnen lassen sich die bundesmittleren 15.317€ je VS mit PV (2016-2019) jedoch, wenn man die 21.830€ Gesundheitsausgaben im letzten Lebensjahr heranzieht, die anhand von Daten der AOK Niedersachsen (2017) ermittelt wurden. Die dortigen Gesamtausgaben schließen dieselben Leistungsarten wie unsere Studie ein, jedoch ohne Hospizkosten, aber zzgl. Krankengeld und Rehabilitation [10]. Weitere Referenzzahlen liefert neben eigenen Vorarbeiten [11] eine Studie, die auf DAK-Daten des Jahres 2012 basiert und Gesamtversorgungskosten im letzten Lebensjahr für VS mit AAPV und keiner SAPV von 24.982€ und für VS mit SAPV von 31.744€ ermittelt (wobei hier zusätzlich Pflegeleistungskosten nach SGB XI einbezogen wurden) [12] sowie eine Studie aus Nordrhein, die für Versicherte mit SAPV im letzten Lebensjahr 36.900€ (Jahre 2014-2016) ermittelte [13].

Zu den Palliativversorgungskosten liegen bislang keine deutschen Studien und Auswertungen vor. Dies gilt auch für durchschnittliche Kosten der Leistungen im Rahmen einer Palliativversorgungsform je Patient. Bekannt ist lediglich die öffentliche Berichterstattung zu den jährlichen Ausgaben für SAPV für die GKV bzw. nach Kassenarten [14] sowie die Vergütungssätze für Einzelleistungen, Leistungskomplexe bzw. Fallpauschalen aus den jeweiligen SAPV-Versorgungsverträgen, EBM-Punkte sowie Zusatzentgelte für stationäre Palliativleistungen.

Regional vergleichende Kosten-Effektivitätsstudien zu palliativer Versorgung sind bislang ebenfalls nicht bekannt. International existieren lediglich Vergleiche verschiedener Versorgungsformen



(stationäre Versorgung mit und ohne PV; ambulante versus stationäre palliative Versorgung), bei denen auch inkrementelle Kosten-Effektivitäts-Relationen berechnet werden [15–17].

### C.3 Weitere Limitationen der Studie

#### ***Weitere Limitationen der angewandten Messung von (Ergebnis-)Qualität***

Limitierend ist auch, dass nicht alle gemessenen qualitätsbezogenen Outcomeindikatoren gleichermaßen belastbar sind. So finden sich auf KV-Ebene trotz vier aggregiert betrachteter Jahre bei den Indikatoren ITS-Aufenthalt, parenterale Ernährung und Magensondennutzung innerhalb der letzten 30 Lebenstage nur sehr geringe Raten, hinter denen sich teilweise nur wenige VS verbergen.

Generell sind insbesondere die Ergebnisse für Bremen und das Saarland aufgrund der kleinen Studienpopulationen als eingeschränkt belastbar zu betrachten.

#### ***Limitationen bei der Identifikation palliativer Versorgungskosten***

Die Erhebung der Palliativversorgungskosten ist dadurch limitiert, dass verschiedene Leistungsarten nicht klar der palliativen Versorgungssituation bzw. den zum Einsatz kommenden palliativen Versorgungsformen zugeordnet werden können. Dies gilt insbesondere für häusliche Krankenpflege, ambulante ärztliche Leistungen, die nicht explizit als palliative Leistungen abgerechnet werden [1] sowie auch für Arzneimittel, Heil- und Hilfsmittel, die zu palliativen Zwecken verordnet werden. Bei der häuslichen Krankenpflege sind wir annäherungsweise so vorgegangen, dass die ab dem Zeitpunkt der ersten abgerechneten Palliativleistung verordnete häusliche Krankenpflege als palliativ veranlasst gewertet wird.

Eine weitere Limitation ist die eingeschränkte Zurechenbarkeit der Vergütung eines Krankenhausfalls (u.a. über DRGs) zu den erbrachten stationären palliativen Versorgungsleistungen. In dieser Studie erfolgt diese Zuordnung ausschließlich anhand der Zusatzentgelte, die nur für einen Teil der Leistungen und teilweise nur für Besondere Einrichtungen gemäß § 17b Absatz. 1 Satz 10 KHG abrechenbar sind [18] und somit zu einer Unterschätzung der GKV-Kosten für stationäre Palliativversorgung führen dürften.

Beide Limitationen sind jedoch nachgeordnet, weil angenommen werden kann, dass sie in allen KV-Regionen gleichermaßen wirken und den KV-Vergleich somit nicht verzerren dürften.

## D. Literatur

1. Ditscheid B, Meissner F, Gebel C et al. (2023) Inanspruchnahme von Palliativversorgung am Lebensende in Deutschland: zeitlicher Verlauf (2016-2019) und regionale Variabilität (Utilization of palliative care at the end of life in Germany: temporal trend (2016-2019) and regional variability). *Bundesgesundheitsblatt - Gesundheitsforschung - Gesundheitsschutz* 66:432–442. <https://doi.org/10.1007/s00103-023-03683-7>
2. Lumley T (2021) Survey. Analysis of Complex Survey Samples. R Package Version 4.1-1
3. Murtagh FE, Bausewein C, Verne J, Groeneveld EI, Kaloki YE, Higginson IJ (2014) How many people need palliative care? A study developing and comparing methods for population-based estimates. *Palliative medicine* 28:49–58. <https://doi.org/10.1177/0269216313489367>
4. Muller CJ, MacLehose RF (2014) Estimating predicted probabilities from logistic regression: different methods correspond to different target populations. *Int J Epidemiol* 43:962–970. <https://doi.org/10.1093/ije/dyu029>
5. Radbruch L, Andersohn F, Walker J (2015) Palliativversorgung - Modul 3. Überversorgung kurativ – Unterversorgung palliativ? Analyse ausgewählter Behandlungen am Lebensende. *Faktencheck Gesundheit*
6. van Baal K, Schrader S, Schneider N et al. (2020) Quality indicators for the evaluation of end-of-life care in Germany - a retrospective cross-sectional analysis of statutory health insurance data. *BMC Palliative Care* 19:187. <https://doi.org/10.1186/s12904-020-00679-x>
7. Just J, Schmitz M-T, Grabenhorst U, Joist T, Horn K, Weckbecker K (2022) Specialized outpatient palliative care—clinical course and predictors for living at home until death. *Dtsch Arztebl Int*:327–332. <https://doi.org/10.3238/arztebl.m2022.0172>
8. Zich K, Sydow H (2015) Palliativversorgung - Modul 1. Sterbeort Krankenhaus - Regionale Unterschiede und Einflussfaktoren. *Faktencheck Gesundheit*
9. Krause M, Ditscheid B, Lehmann T et al. (2021) Effectiveness of two types of palliative home care in cancer and non-cancer patients: A retrospective population-based study using claims data. *Palliative medicine* 35:1158–1169. <https://doi.org/10.1177/02692163211013666>
10. Stahmeyer JT, Hamp S, Zeidler J, Eberhard S (2021) Gesundheitsausgaben und die Rolle des Alters: Eine detaillierte Analyse der Kosten von Überlebenden und Verstorbenen. *Bundesgesundheitsblatt - Gesundheitsforschung - Gesundheitsschutz* 64:1307–1314. <https://doi.org/10.1007/s00103-021-03385-y>
11. Meißner W, Nauck F, Wedding U et al. (2021) SAVOIR - Evaluierung der SAPV-Richtlinie: Outcomes, Interaktionen, Regionale Unterschiede. Ergebnisbericht zum Projekt SAVOIR (01VSF16005), G-BA. Innovationsausschuss
12. Rusche H, Kreimendahl F, Huenges B, Becka D, Rychlik R (2016) Medizinische Versorgung und Kosten im letzten Lebensjahr (Medical care and costs in the last year of life – propensity score matching of AAPV and SAPV insurants). *Dtsch med Wochenschr* 141:e203-e212. <https://doi.org/10.1055/s-0042-114481>
13. Meyer I, Schubert I (2020) Inanspruchnahme von SAPV und weiteren palliativen Leistungen, Charakteristika der Leistungsempfänger und Hinweise auf die Zielerreichung von SAPV in der Region Nordrhein. Bericht zur retrospektiven Sekundärdatenanalyse [AP1.1] im Projekt APVEL - Ambulante Palliative Versorgung Evaluieren. In: Krumm N, Rolke R: Evaluation der Wirksamkeit von SAPV in Nordrhein. Ergebnisbericht zum Projekt APVEL (01VSF16007), S 27–134
14. Bundesministerium für Gesundheit KJ 1-Statistik. <https://www.bundesgesundheitsministerium.de/themen/krankenversicherung/zahlen-und-fakten-zur-krankenversicherung/finanzergebnisse>. Zugegriffen: 3. Mai 2023

15. Hashimoto Y, Hayashi A, Teng L, Igarashi A (2021) Real-World Cost-Effectiveness of Palliative Care for Terminal Cancer Patients in a Japanese General Hospital. *J Palliat Med* 24:1284–1290. <https://doi.org/10.1089/jpm.2020.0649>
16. Cartoni C, Breccia M, Giesinger JM et al. (2021) Early Palliative Home Care versus Hospital Care for Patients with Hematologic Malignancies: A Cost-Effectiveness Study. *J Palliat Med* 24:887–893. <https://doi.org/10.1089/jpm.2020.0396>
17. Serra-Prat M, Gallo P, Picaza JM (2001) Home palliative care as a cost-saving alternative: evidence from Catalonia. *Palliat Med* 15:271–278. <https://doi.org/10.1191/026921601678320250>
18. Fallpauschalen-Katalog. G-DRG-Version 2019
